# 1            **Epithelial colonies *in vitro* elongate through collective effects**

2  
3  
4    Jordi Comelles<sup>1</sup>, Soumya SS<sup>2</sup>, Linjie Lu<sup>1</sup>, Emilie Le Maout<sup>1</sup>, S. Anvitha<sup>3</sup>, Guillaume  
5    Salbreux<sup>4</sup>, Frank Jülicher<sup>5,6</sup>, Mandar M. Inamdar<sup>2#</sup>, Daniel Riveline<sup>1\*</sup>

6  
7    <sup>1</sup>Laboratory of Cell Physics ISIS/IGBMC, CNRS and University of Strasbourg,  
8    Strasbourg, France; Institut de Génétique et de Biologie Moléculaire et Cellulaire,  
9    Illkirch, France; Centre National de la Recherche Scientifique, UMR7104, Illkirch,  
10    France; Institut National de la Santé et de la Recherche Médicale, U964, Illkirch, France;  
11    Université de Strasbourg, Illkirch, France.

12    <sup>2</sup>Department of Civil Engineering, Indian Institute of Technology Bombay, Powai,  
13    Mumbai 400076, INDIA.

14    <sup>3</sup>Department of Mechanical Engineering, Indian Institute of Technology Bombay, Powai,  
15    Mumbai 400076, INDIA.

16    <sup>4</sup>The Francis Crick Institute, 1 Midland Road, London NW1 1AT, United Kingdom.

17    <sup>5</sup>Max Planck Institute for the Physics of Complex Systems, Nöthnitzer Str. 38, 01187  
18    Dresden, Germany.

19    <sup>6</sup>Cluster of Excellence Physics of Life, TU Dresden, Germany.

20  
21    Electronic address: [#minamdar@iitb.ac.in](mailto:#minamdar@iitb.ac.in), [\\*riveline@unistra.fr](mailto:*riveline@unistra.fr)

## 22            **Abstract**

23  
24  
25    *Epithelial tissues of the developing embryos elongate by different mechanisms, such as*  
26    *neighbor exchange, cell elongation, and oriented cell division. Since autonomous tissue*  
27    *self-organization is influenced by external cues such as morphogen gradients or*  
28    *neighboring tissues, it is difficult to distinguish intrinsic from directed tissue behavior.*  
29    *The mesoscopic processes leading to the different mechanisms remain elusive. Here, we*  
30    *study the spontaneous elongation behavior of spreading circular epithelial colonies in*  
31    *vitro. By quantifying deformation kinematics at multiple scales, we report that global*  
32    *elongation happens primarily due to cell elongations, and its direction correlates with*  
33    *the anisotropy of the average cell elongation. By imposing an external time-periodic*  
34    *stretch, the axis of this global symmetry breaking can be modified and elongation occurs*  
35    *primarily due to orientated neighbor exchange. These different behaviors are confirmed*  
36    *using a vertex model for collective cell behavior, providing a framework for*  
37    *understanding autonomous tissue elongation and its origins.*

## 38            **Introduction**

39  
40  
41    Tissue elongation is a central morphogenetic event occurring in many organisms during  
42    development (Lecuit and Lenne, 2007; Guillot and Lecuit, 2013), such as *Drosophila* or  
43    *C. elegans*. The tissue is transformed both in terms of area and shape. Such transformation  
44    takes place within typically hour timescale with or without cell division. During this  
45    process, symmetry of cells and tissues is broken by different mechanisms, such as  
46    neighbor exchange (Rauzi *et al.*, 2008; Rauzi, Lenne and Lecuit, 2010), cell elongation  
47    (Clarletta, Ben Amar and Labouesse, 2009; Vuong-Brender, Yang and Labouesse, 2016)  
48    and oriented cell division (Campinho *et al.*, 2013). Rearrangement of neighboring cells  
49    or T1 transitions is essential in the germ band extension of *Drosophila* (Rauzi *et al.*, 2008;  
50    Rauzi, Lenne and Lecuit, 2010), allowing a group of cells to change their position by

1 intercalation, eventually leading to tissue elongation. Cell deformation drives the 3-fold  
2 elongation process in *C. elegans* (Clarletta, Ben Amar and Labouesse, 2009; Vuong-  
3 Brender, Yang and Labouesse, 2016) while keeping the number of cells and their  
4 positions fixed. Finally, epithelial spreading during zebrafish epiboly is promoted by  
5 oriented cell divisions as a mechanism to limit tension (Campinho *et al.*, 2013). Those  
6 mechanisms can act alone or in combination as in *Drosophila* pupal wing elongation  
7 (Etournay *et al.*, 2015). While the phenomenon is known to involve remodeling of  
8 adherens junctions (Rauzi, Lenne and Lecuit, 2010) and acto-myosin (He *et al.*, 2010;  
9 Rauzi, Lenne and Lecuit, 2010) at the molecular level, mesoscopic mechanisms leading  
10 to distinct morphogenesis processes are poorly understood. This is partly because inputs  
11 from morphogen gradients (Gilmour, Rembold and Leptin, 2017) or from neighboring  
12 tissues (Zhang *et al.*, 2011; Etournay *et al.*, 2015) can affect tissue autonomous self-  
13 organization *in vivo*. For example, changes in tissue shape can be influenced by  
14 neighboring tissues such as the cuticle and the blade in the *Drosophila* pupal wing  
15 elongation (Etournay *et al.*, 2015), the coordination between amnioserosa and epidermis  
16 in dorsal closure (Hayes and Solon, 2017), and the muscle layer in gut development  
17 (Shyer *et al.*, 2013) or in *C. elegans* morphogenesis (Zhang *et al.*, 2011). Since *in vivo*,  
18 epithelial tissues are surrounded by other tissues and the cellular dynamics leading to  
19 elongation can result from interactions between tissues and boundary conditions, it is  
20 therefore difficult to disentangle cell intrinsic from externally mediated behaviors. In this  
21 context, it appears important to characterize elongation in an *in vitro* system where the  
22 epithelial tissue undergoes shape transition autonomously.  
23 Here we use *in vitro* experiments and numerical simulations to characterize the  
24 spontaneous behavior of a growing cell colony *in vitro*. We designed an assay to study  
25 the spontaneous elongation of a tissue that is not subjected to external orienting input, we  
26 studied the appearance of the symmetry breaking, and the effect that external forces have  
27 in this process. We show that *in vitro* tissue elongation arises from anisotropy in the  
28 average cell elongation. This anisotropy sets the direction along which boundary cells  
29 migrate radially outwards resulting in a non-isotropic elongation that arises primarily  
30 through cell elongation. For colonies submitted to a time periodic uniaxial stretch, the  
31 axis of global symmetry breaking can be imposed by external force, and tissue elongation  
32 arises through oriented neighbor exchange. Emergence of radially migrating cells and the  
33 interplay between cell elongation and cell rearrangements are confirmed by numerical  
34 simulations based on a vertex model. Our results suggest that spontaneous shape  
35 deformation is related to the mean orientation of the nematic cell elongation field in the  
36 absence of any external input. This provides a framework to explain autonomous tissue  
37 elongation and how contributions from different mesoscopic mechanisms can be  
38 modulated by external forces.

39

## 40 **Results**

41

42 **Isotropic colonies elongate in a non-isotropic manner.** To study the spontaneous tissue  
43 deformation arising during epithelial growth, we designed an *in vitro* assay to track  
44 symmetry breaking, both spontaneous and driven by external force. We prepared  
45 isotropic colonies of Madin Darby Canine Kidney (MDCK) cells, which assume features  
46 of epithelial cells *in vivo* (Reinsch and Karsenti, 1994; Adams *et al.*, 1998; Reffay *et al.*,  
47 2014), such as adherens junctions (Adams *et al.*, 1998), cytoskeletal components and the  
48 Rho signaling pathway regulating cell shapes and dynamics (Reffay *et al.*, 2014; Fodor  
49 *et al.*, 2018). The initial size and shape of the colonies were controlled by plating cells in  
50 microfabricated circular stencils (Ostuni *et al.*, 2000). When cells reached confluency,

1 the stencil was removed at time  $t_0$ . Cell dynamics was followed over time by phase  
2 contrast (Video 1) or fluorescence microscopy with strains labeled with GFP cadherin  
3 (Figure 1b), that allowed to observe the behavior of individual cells. We observed that  
4 large colonies (750  $\mu\text{m}$  in diameter) expanded isotropically (Figure 1 – figure supplement  
5 1). In contrast, colonies of 250  $\mu\text{m}$  in diameter (Figure 1a), the typical coherence length  
6 of such epithelial tissues (Doxzen *et al.*, 2013), expanded in a non-isotropic manner  
7 (Figure 1c). We then further characterized the process of symmetry breaking.  
8 In order to compare elongations in each experiment, we quantified the breaking of  
9 symmetry by ellipse-fitting the colony shape. Shape change analysis was quantified by a  
10 nematic shape elongation tensor  $\mathbf{Q}$ . It has two independent components defined as  $Q_{xx} =$   
11  $\frac{1}{2} \ln(a/b) \cos(2 \cdot (\theta - \alpha))$  and  $Q_{xy} = \frac{1}{2} \ln(a/b) \sin(2 \cdot (\theta - \alpha))$ , where  $a$  corresponds to the  
12 major axis,  $b$  to the minor axis,  $\theta$  to the orientation of the major axis of the ellipse and  $\alpha$   
13  $= \theta(t_{\text{final}})$  (Figure 1d). As can be seen in Figure 1e, MDCK colonies elongated persistently  
14 along the main axis of elongation ( $Q_{xx} > 0$  and  $Q_{xy} \approx 0$ ) for 6 hours (Figure 1e). In  
15 addition, we explored if other epithelial cell lines would behave in a similar manner.  
16 Circular epithelial colonies of human epithelial colorectal adenocarcinoma cells (Caco2)  
17 and human mammary epithelial cells (MCF-10A) also elongated along the main axis of  
18 elongation and by the same magnitude that MDCK cells (Figure 1 – figure supplement  
19 2). We note that elongation observed during this time for the three epithelial cell lines  
20 was similar in magnitude to tissue elongation observed during *in vivo* morphogenesis, for  
21 instance in the wing blade in *Drosophila* (Etournay *et al.*, 2015). Moreover, the  
22 elongation direction ( $\theta_{\text{final}} = \theta(t = 6 \text{ h})$ ) converges to a constant value within 2 hours after  
23  $t_0$  (Figure 1f). Altogether, large circular epithelial colonies (750  $\mu\text{m}$  in diameter) expand  
24 isotropically, whereas small colonies (250  $\mu\text{m}$  in diameter) expand in a anisotropic  
25 manner and shape symmetry breaking takes place within the first 2 hours. As a result, we  
26 focus here on these first 2 hours during which the elongation axis is established.

27  
28 **Cyclic uniaxial stretching rectifies symmetry breaking.** It has been previously  
29 described for *C. elegans* embryo elongation (Zhang *et al.*, 2011) and in other organisms  
30 (Zhang and Labouesse, 2012) that time periodic stretch can play a role in morphogenesis.  
31 Motivated by these observations, we explored whether oscillatory external forces could  
32 have an impact on the direction of elongation. We designed an experimental set-up where  
33 elongating colonies were submitted to cyclic uniaxial stretching (Figure 2a and Video 2).  
34 Mechanical cycles of contraction-relaxation can range from 1 s in *C. elegans* epithelial  
35 elongation (Zhang *et al.*, 2011) up to 200 s in dorsal closure (Solon *et al.*, 2009). So, we  
36 explored frequencies and extensions around physiological values (Zhang and Labouesse,  
37 2012). We selected three different cycle durations (20 s, 60 s, and 120 s period) and three  
38 different stretching conditions (5%, 10% and 15% strain). The stretch was applied to a  
39 silicon membrane and was transmitted to the colony. We then fitted the colonies shapes  
40 with ellipses at successive time and quantified  $Q_{xx}$  and  $Q_{xy}$  with respect to the angle of  
41 uniaxial stretching (set as  $x$ -axis,  $\alpha = 0$ ). Figure 2 – figure supplement 1 shows the value  
42 of the components of the tensor  $\mathbf{Q}$  along time for the different strains and periods tested.  
43 Among different conditions, we observed colony elongation along the direction imposed  
44 by the external strain when we stretched cyclically with 60 s timescale and 5% strain  
45 (Figure 2b and Video 3). The overall elongation of colonies under cyclic uniaxial  
46 stretching was similar to the spontaneous elongation in the absence of externally applied  
47 uniaxial stretching during the first two hours (Figure 2c). Also, the magnitude of the shape  
48 elongation tensor  $\mathbf{Q}$  under cyclic uniaxial stretching was comparable to the spontaneous  
49 elongation of colony when stretch was not applied, but elongation was oriented in the  
50 direction of externally applied uniaxial cyclic stretching (Figure 2d). Therefore,

1 application of an external cyclic force can rectify symmetry breaking and set the direction  
2 of tissue elongation.

3  
4 **Collective effects are essential for rectification.** To get further insight into the collective  
5 nature of the rectification of tissue elongation, we probed the roles of adhesion between  
6 cells. First, we stretched single MDCK cells, individually plated. We observed that cells  
7 oriented perpendicularly to the externally applied uniaxial cyclic stretching (Figures 3a  
8 and 3b) as previously reported for fibroblasts (Faust *et al.*, 2011). Then we blocked cell-  
9 cell junction in circular colonies prior stretching. Briefly, we incubated confluent colonies  
10 in medium containing 5 mM EDTA and 10  $\mu$ g/ml anti- E-cadherin blocking antibody that  
11 targeted the extracellular domain of E-cadherin for 30 min (Harris, Daeden and Charras,  
12 2014). Then, medium was replaced by normal medium and the evolution of colonies with  
13 and without stretch was followed (Figure 3c). In the absence of externally applied uniaxial  
14 cyclic stretching, colonies treated with anti E-cadherin antibody expanded more than  
15 control colonies. Moreover, this expansion was still along one preferential direction  
16 (Figure 3d). Under cyclic uniaxial stretching, elongation was also non-isotropic and along  
17 the direction perpendicular to the cyclic stretching direction, in contrast to the parallel  
18 elongation observed when cell-cell contacts were intact (Figure 2b-d). This supports the  
19 collective nature of colony elongation. It is worth noting that cells inside the colony  
20 exhibited a decrease in their mean velocity (Figure 3e) and a large recruitment of myosin  
21 within cells similar to reinforcements (Riveline *et al.*, 2001) in stretching conditions, as  
22 shown by the appearance of stress fibers (Figure 3f). However, this effect did not appear  
23 to affect the overall elongation rate. Altogether these data suggest that the asymmetric  
24 expansion of colonies in the direction imposed by cyclic uniaxial stretching is generally  
25 associated to a collective effect.

26  
27 **Fingers and symmetry breaking.** We next sought to identify the source of symmetry  
28 breaking in both conditions, with and without application of cyclic uniaxial stretching. It  
29 has previously been reported that in MDCK monolayers, cells can migrate tangentially to  
30 the monolayer boundary when confined (Doxzen *et al.*, 2013), or perpendicular to the  
31 boundary in the form of multicellular groups or fingers during monolayer expansion  
32 (Reffay *et al.*, 2011, 2014). During spontaneous elongation of MDCK colonies in the  
33 absence of externally applied cyclic stretching (Video 4), we observed that boundary cells  
34 tend to move either perpendicularly or tangentially to the colony boundary (Figure 4a).  
35 In most of the experiments, an acto-myosin cable, similar to compartmentalization  
36 boundaries *in vivo* (Monier *et al.*, 2010; Calzolari, Terriente and Pujades, 2014), was  
37 observed in the outer boundary of the colonies at stencil removal (see Figure 4 – figure  
38 supplement 1). When this supra-cellular structure is intact, cells at the periphery are  
39 reported to undergo clockwise and counter clockwise rotations (Doxzen *et al.*, 2013). In  
40 contrast, when a local interruption of this cable appeared, the cell at the vicinity could  
41 extend a lamellipodia and move away and radially from the center of the colony (Figure  
42 4 – figure supplement 2a). Apparently, a local defect in the cable could promote the local  
43 protrusion of a cell in the direction normal to the edge as shown in laser ablation  
44 experiments previously (Reffay *et al.*, 2014). Several local defects could appear within  
45 the same colony, thus providing the opportunity for cells in the vicinity to protrude  
46 outwards. This cell has been termed leader cell (Reffay *et al.*, 2011) and the collection of  
47 cells protruding from the circular colonies along this cell can be identified as the finger-  
48 like structures already reported for MDCK monolayers (Reffay *et al.*, 2011, 2014).  
49 We performed cell tracking and observed that, on average, these protruding cells are  
50 faster than other boundary cells (Figure 4a and Figure 4 – figure supplement 2b and 2c).



1 They are characterized also by radial and directional migrations, in contrast to tangential  
2 motion observed in the other cells of the outer region of the colony (Figure 4 – figure  
3 supplement 2d and 2e). In general, the motion of these so-called leader cells was  
4 directionally persistent and on average the shape of the whole colony followed the same  
5 overall direction (Figure 4b and 4c). To correlate colony elongation with leader cell  
6 orientation, we analyzed the evolution of a larger number of colonies for 2 hours after  
7 stencil removal (Video 4). We quantified the breaking of symmetry by fitting an ellipse  
8 to the shape of each colony. We then tracked the positions where finger-like structures  
9 were appearing, as well as the direction and distance performed by each of them. We  
10 could observe that the elongation direction of the whole colony correlated on average  
11 with the direction of the leader cell migration and associated finger (Figure 4c).

12 We then measured the position and displacement for each finger in control colonies and  
13 colonies under cyclic uniaxial stretching (Figure 4d). We observed that, when growing  
14 perpendicular to the direction of force application, finger cells performed shorter  
15 displacements than when growing parallel to it. In the absence of externally applied cyclic  
16 uniaxial stretching, fingers grew a similar amount as when growing parallel the direction  
17 of applied uniaxial cyclic stretching and no bias was observed *vis-à-vis* the nucleation  
18 position (Figure 4d and Figure 4 – figure supplement 2f). To further explore this effect,  
19 we grew MDCK monolayers with straight boundaries either parallel or perpendicular to  
20 the external force. Then, we let fingers appear and grow for 2 hours before applying cyclic  
21 uniaxial stretching (Figure 4e). When fingers were growing perpendicular to the  
22 stretching direction, they shrank upon application of cyclic uniaxial stretching; in  
23 contrast, fingers further elongated when parallel to the direction of uniaxial cyclic  
24 stretching. Altogether, this suggests that direction of finger-like structures correlates with  
25 elongation direction, and that external stretching affects the dynamics of finger growth.

26  
27 **Collective effects and symmetry breaking.** Finger growth correlates with colony  
28 elongation. However whether it is a cause or consequence of the symmetry breaking of  
29 the shape of the colony remains elusive. We therefore explored the possibility of inducing  
30 the growth of fingers and therefore set the direction of elongation of the colonies.  
31 Breakage of the acto-myosin cable by laser ablation induces the appearance of leader cells  
32 (Reffay *et al.*, 2014). Hence we attempted to trigger the growth of fingers by locally  
33 injecting cytochalasin D using a micropipette. The transient injection of this actin  
34 polymerization inhibitor was followed by the disruption of the acto-myosin cable (Video  
35 5 and Figure 5 – figure supplement 1). However, the cable reformed, and fingers did not  
36 appear. This result shows that breakage of the cable alone doesn't trigger the growth of  
37 fingers in our colonies, and suggests that other mechanisms may be involved.

38 We observed that when a finger moves outward from the colony, cells in the immediate  
39 vicinity elongate and seem to reorient their elongation axis towards the finger (Figure 5a).  
40 Recent studies have shown that the nematic field of cell elongation and its topological  
41 defects could be involved in the growth of bacterial colonies (Doostmohammadi, Thampi  
42 and Yeomans, 2016) and in controlling dynamics, death and extrusion of epithelial cells  
43 (Kawaguchi, Kageyama and Sano, 2017; Saw *et al.*, 2017; Mueller, Yeomans and  
44 Doostmohammadi, 2019). We wondered if the spontaneous elongation of colonies would  
45 also be related to the average cell elongation. We followed the evolution of the cell  
46 elongation nematic field in different MDCK and MCF 10A colonies during expansion.  
47 We first obtained the spatio-temporal cell elongation nematic orientation field  $\phi(x, y, t)$   
48 (see Methods) on the experimental time-lapse images (see Figure 5b, Figure 5 – figure  
49 supplement 2a-c, Video 6 and Supplementary Material Section IC). We could then obtain  
50 the angle  $\theta_{\text{nematic}}$  of the average cell-shape nematic field at  $t_0$  which we compared with

1 final colony orientation  $\theta_{\text{colony}}$  obtained using the ellipse fitting analysis (Figure 5c, Figure  
2 5 – figure supplement 2d and Supplementary Material Section IC). Strikingly, we  
3 observed a clear average cell elongation even at the time of stencil removal  $t_0$ , and the  
4 corresponding angle  $\theta_{\text{nematic}}$  correlated with colony orientation when elongation direction  
5 was established for both MDCK and MCF 10A cell lines (Figure 5d, Figure 5 – figure  
6 supplement 2d and 2e). The cell elongation orientation field  $\phi(x, y, t)$  was not  
7 homogeneous at  $t_0$  but exhibited a complex pattern with  $\pm\frac{1}{2}$  topological defects (Figure  
8 5b and Supplementary Material Section ID). Interestingly, an expression that provides  
9 equilibrium orientation of liquid crystals with defects and having one constant Frank free  
10 energy,

$$\phi(x, y)_{\text{fit}} = \alpha + \sum_i k_i \frac{y - y_i}{x - x_i}, \quad (1)$$

12 mimics the experimentally observed orientation field  $\phi(x, y)$  very well with just one  
13 fitting parameter  $\alpha$  (see Supplementary Material Section ID for details.) Here  $k_i = \pm\frac{1}{2}$  and  
14  $(x_i, y_i)$  are the strength and location, respectively, of the topological defects obtained from  
15 the experimental image. Thus, the defect position and strength can be used to provide an  
16 approximate readout for the orientation of the cell-shape nematic field (Figure 5d).  
17 Moreover, the location of finger nucleation seemed to be biased towards the position of  
18 topological defects. However, some defect locations were not stable in time and in some  
19 cases, the nematic field of cell shapes could only be interpreted in terms of virtual defects  
20 outside the colonies, thus suggesting that the mean nematic direction is a better readout  
21 for the cell-shape nematic field.

22 On the one hand, finger nucleation seemed to be correlated with colony elongation  
23 direction (Figure 4c). On the other hand, the orientation of tissue elongation correlates  
24 with orientation of average cell elongation at  $t_0$  (Figure 5 and Figure 5 – figure supplement  
25 2). This suggests that leader cells moving outward from the colony may not be the cause  
26 of symmetry breaking in colony shape, but rather follow from the initial cell shape  
27 elongation before stencil removal. Moreover, we found no correlation between breaks of  
28 the acto-myosin cable surrounding the colony and the mean nematic direction (Figure 5-  
29 figure supplement 4), which suggests that breaks are uniformly distributed along the  
30 colony border. We have also shown that breakage of acto-myosin cable after stencil  
31 removal, which is associated with leader cell formation (Reffay *et al.*, 2014), did not  
32 necessarily induce the growth of fingers in our colonies. Altogether, our results could  
33 indicate that the orientation of the mean cell-shape nematic of the colony before stencil  
34 removal sets the direction of elongation by triggering the growth of fingers, which appear  
35 at the discontinuities of the outer acto-myosin cable located along the nematic orientation,  
36 while preventing finger growth at discontinuities located in other directions.

37 Finally, when looking at the evolution of the mean cell elongation nematic field of  
38 colonies under uniaxial cyclic stretching, we observed that it did not change over time  
39 (Figure 5 – figure supplement 5). The initial mean direction of cell elongation, either  
40 parallel or perpendicular to the external stretching, was maintained throughout 2 hours of  
41 external stretching. This suggests that average cell elongation alone does not determine  
42 colony elongation direction when subjected to uniaxial cyclic stretching.

43  
44 **Contributions to symmetry breaking.** We next sought to evaluate quantitatively the  
45 contribution of cellular processes to elongation. We quantified the contributions of each  
46 cellular event using image segmentation, cell tracking and neighbor triangulation  
47 (Etournay *et al.*, 2015, 2016) (see Supplementary Material Section IA, Figure 6a and 6b,  
48 Figure 6 – figure supplement 1 and Figure 6 – figure supplement 2, and Video 7). This  
49 procedure decomposes overall tissue elongation, which is quantified in terms of

1 cumulative total pure shear, into contributions from cell elongation and topological  
2 changes. Five main events contribute to total shear: cell elongation change, cell division,  
3 cell extrusion, T1 transition, and correlation effects (Etournay *et al.*, 2015, 2016). At the  
4 colony scale, shear decomposition plots (Figure 6c and Figure 6 – figure supplement 3)  
5 revealed that the total pure shear gives values consistent with elongation estimates from  
6 ellipse fitting (Figure 6d). Note that various contributions to shear decomposition exhibit  
7 significant variability between experiments (Figure 6 – figure supplement 3). However,  
8 we found that after the first 2 hours, the contribution of cell elongation is generally  
9 comparable to the total pure shear, with a smaller contribution from other sources (Figure  
10 6d). When looking at the shear decompositions of colonies under cyclic uniaxial  
11 stretching (Figure 6e and Figure 6 – figure supplement 3), the cumulative shear values  
12 were also similar to the ones obtained by ellipse fitting (Figure 6f). Interestingly, we  
13 found however that in that case, shear created by T1 transitions is the main contributor  
14 for the total pure shear, while cell elongation does not contribute to tissue elongation  
15 (Figure 6f and Figure 6 – figure supplement 3). This indicates that applying oscillatory  
16 forces to the tissue changes fundamentally the main mode of tissue elongation by favoring  
17 topological rearrangements of the cell network.

18  
19 **Vertex model recapitulates symmetry breaking and shear decomposition.** We then  
20 asked whether a model could reproduce experimental observations of shear  
21 decomposition and, in particular, in which conditions tissue elongation would arise from  
22 cell elongation or from topological transitions. We developed a vertex model which takes  
23 into account mechanical anisotropies such as active stresses and polarized cell bond  
24 tension (see Figure 7a and Supplementary Material Section II). We generated a confluent  
25 colony of circularly confined cells, in which a unit director  $\mathbf{p}$  that represented the cell  
26 polarity was assigned to each cell. Based on orientation of the director, each cell generated  
27 an extensile active stress  $\sigma_a$  and bias  $\lambda$  in the base value of its edge contractility to promote  
28 cell elongation and active T1 transitions. We assumed that the experimentally measured  
29 cell elongation nematic  $\mathbf{q}$  is a readout of the underlying cell polarity  $\mathbf{p}$  (Figure 7b). Hence,  
30 the initial spatial distribution of  $\mathbf{p}$  was based on the commonly observed pattern of  $\mathbf{q}$   
31 (Figure 7c). To evolve  $\mathbf{p}$  with time, we imposed that  $\mathbf{p}$  of the exterior cells tended to be  
32 parallel to the boundary, whereas the inner cells tended to align their  $\mathbf{p}$  with those of their  
33 neighbors (Supplementary Material Section IID).

34 Upon removal of confinement, we found that the simulated colony spontaneously  
35 elongates, in a direction set by the orientation of the mean cell elongation nematic field,  
36 along with the formation of finger-like structures near the  $+1/2$  defect, as observed  
37 experimentally (see Video 8). Our simulations therefore reproduce experimental  
38 observations indicating that colony deformation can be understood without forces exerted  
39 by a leader cell at the colony boundary (Figure 7c, Video 8, and Supplementary Material  
40 Section II). To test whether we could also recapitulate different contributions of the total  
41 pure shear inside the tissue, we performed a shear decomposition analysis of *in silico*  
42 movies. We found a qualitatively similar cumulative shear-strain decomposition as was  
43 observed in experiments (Figure 7d and 7e), where the main contribution came from cell  
44 elongation. Moreover, by changing the relative contributions of the cellular active stress  
45 magnitude ( $\sigma_a$ ) and the edge tension bias ( $\lambda$ ), we could modulate the relative contributions  
46 from cell elongations and T1 transitions to the total pure shear (Figure 7 – figure  
47 supplement 1) as was also observed in experiments with colonies in the absence or  
48 presence of cyclic stretching (Figure 6 – figure supplement 3). When  $\sigma_a$  was dominant,  
49 the colony elongation was primarily due to cell elongation, whereas when  $\lambda$  was the  
50 stronger term, T1 transitions were the main cause of colony elongation. These results

1 reveal possible cellular mechanisms that can govern the process of tissue deformation and  
2 influence whether cell elongation, or cellular rearrangements, dominate tissue elongation.  
3 Our vertex model assumed that the cell elongation was the main readout for cell polarity,  
4 and it did not explicitly account for the effect of substrate stretching. To incorporate  
5 uniaxial cyclic stretching we developed further the model. Our results show that initial  
6 cell shape elongation does not have a preferential direction (Figure 5 – figure supplement  
7 5), but colony elongation under uniaxial cyclic stretching is along  $x$  axis, the direction of  
8 stretching, and mainly achieved through T1 transitions (Figure 2c and Figure 6f). Also,  
9 we report that the elongation happens along  $y$  axis, perpendicular to the direction of  
10 stretching, in single cells and cell colonies with lowered Ecadherin levels (Figure 3a-d).  
11 These two experimental observations can be implemented in the model. First, by  
12 introducing an additional term  $m_{\text{stretch}}$  that oriented cell polarisation  $\mathbf{p}$  along  $x$  axis, for  
13 any given initial condition, upon confinement removal at  $t_0$  – this term is inactive in the  
14 absence of uniaxial stretching (Supplementary Material Section II). Then, by using cell  
15 active stress  $\sigma_a > 0$ , we mimicked the tendency of single cells to elongate perpendicular  
16 to the orientation of polarity, *i.e.*, perpendicular to the uniaxial stretching, whereas the  
17 bias in the edge tension  $\lambda > 0$  induced T1 transitions along the polarity of the cell, *i.e.*,  
18 parallel to the uniaxial stretching. Thus, in the presence of uniaxial stretching,  $m_{\text{stretch}}$   
19 oriented cell polarities along  $x$ , while the relative magnitudes of single cell active stress  
20  $\sigma_a$  and edge-contractility bias  $\lambda$  dictated the orientation of the colony elongation. When  
21 keeping a lower magnitude of  $\sigma_a$  and a higher value of  $\lambda$ , colonies elongated along  $x$   
22 through T1 transitions (Figure 7f and Video 9), mimicking colony elongation under  
23 uniaxial cyclic stretching (Figure 2 and Figure 6f). On the contrary, by increasing  $\sigma_a$  and  
24 lowering  $\lambda$  (Ecadherin deficient colonies), colonies elongate perpendicular to  $x$  (Figure  
25 7g and Video 9), mimicking colonies under uniaxial cyclic stretching treated with E-  
26 cadherin antibody (Figure 3c-d). Therefore, we propose that a competition between the  
27 strength of active T1 transitions parallel to the external stretching and active cell stress  
28 perpendicular to the external stretching dictate overall colony elongation under uniaxial  
29 cyclic stretching. When cell-cell junctions are intact, colony elongation is along the  
30 direction of stretching and through T1 transitions (Figure 2c and Figure 6f), suggesting  
31 that the tendency of single cells to orient along  $y$  (Figure 3a-b) is partially screened by  
32 cell-cell junctions via T1 transitions. When cell-cell junctions are weakened, active cell  
33 stress dominates, and colonies elongate perpendicular to the uniaxial stretching (Figure  
34 3c and 3d), which could be thought of to be closer to a collection of single cells.

35  
36 **Stretching-dependent elongation is mediated by ROCK.** We showed that upon  
37 stretching, cells reduced their speed and myosin structures appeared (Figure 3e and 3f).  
38 These type of cellular responses to external stretching involve the Rho-associated protein  
39 kinase (ROCK) (Hart *et al.*, 2020), which is also involved in cell-cell contacts integrity  
40 (Nishimura and Takeichi, 2008; Ewald *et al.*, 2012). We treated MDCK colonies with a  
41 ROCK inhibitor (Y-27632 50 $\mu$ M) and followed their behavior for 2 hours, both in the  
42 absence and the presence of cyclic uniaxial stretching (Figure 8 – figure supplement 1).  
43 When cyclic stretching was applied, elongation along the direction of the uniaxial cyclic  
44 stretching was absent ( $Q_{xx} \approx Q_{yy}$ ) (Figure 8 – figure supplement 1a and 1b). However,  
45 colonies still elongated anisotropically, similar to colonies in the absence of application  
46 of uniaxial cyclic stretching (Figure 8 – figure supplement 1c). According to our model,  
47 when edge tension bias is sufficiently large, the dominant mechanism for tissue  
48 elongation switches from single cell elongations to T1 transitions (Figure 7 – figure  
49 supplement 1). We observed that uniaxial cyclic stretching triggers this type of elongation  
50 (Figure 6f). Therefore, if the effect that application of uniaxial cyclic stretching has at the



1 cellular level was reduced, colonies subjected to cyclic uniaxial stretching should  
2 preferentially elongate as if cellular active stress becomes dominant, *i.e.* through single  
3 cell elongation. Strikingly, shear decomposition analysis shows that the elongation  
4 mechanism shifts from T1 transition-dominant to cell elongation-dominant when colonies  
5 under uniaxial cyclic stretch have ROCK inhibited (Figure 8a-b). In summary, colonies  
6 under cyclic uniaxial stretching elongate through T1 transitions rather than through cell  
7 elongation (red dot in Figure 8c) similar to what our model predicts for colonies with  
8 increased biased edge tension. In contrast, colonies elongate spontaneously largely  
9 through single cell elongation, which the model predicts when the effect of the cellular  
10 active stress is more dominant (green dot in Figure 8c). Strikingly, the application of a  
11 ROCK inhibitor leads to single cell elongation dominating over T1 (orange dot in Figure  
12 8c), effectively suppressing the effect of uniaxial cyclic stretching on the mode of colony  
13 deformation (Figure 8 – figure supplement 1).

## 14 Discussion

15 Tissue spreading is key during embryonic development (Bénazéraf *et al.*, 2010;  
16 Campinho *et al.*, 2013; Etournay *et al.*, 2015). Epithelial cells migrate in a collective and  
17 cohesive manner. In many cases symmetry is broken leading to shape transformation. The  
18 resulting tissue kinematics and the underlying mechanisms for this symmetry breaking  
19 has been studied using original approaches, and is understood with a variety of cell-based  
20 and continuum models *in vivo* (Blanchard *et al.*, 2009; Clarletta, Ben Amar and  
21 Labouesse, 2009; Aigouy *et al.*, 2010; Etournay *et al.*, 2015; Guirao *et al.*, 2015; Alt,  
22 Ganguly and Salbreux, 2017). On the *in vitro* situation too, combination of theory and  
23 experiments have been applied on similar phenomena (Mark *et al.*, 2010; Tarle *et al.*,  
24 2015; Kawaguchi, Kageyama and Sano, 2017; Saw *et al.*, 2017).  
25

26 In the present work, we sought to integrate knowledge from *in vitro* and *in vivo* studies  
27 to test new ideas for breaking symmetry through collective effects. First we showed that  
28 initially circular colonies of three different epithelial cell lines spontaneously expanded  
29 in a non-isotropic manner and the elongation observed was similar in magnitude to  
30 *Drosophila* wing blade elongation *in vivo* (Etournay *et al.*, 2015). However, the  
31 undeformed circular colonies have a non-zero average cell elongation even before  
32 spreading starts, which determines orientation of the final colony shape. Our analysis also  
33 showed that the cell orientation patterns are not homogeneous but spatially organized and  
34 directed by the presence of  $\pm\frac{1}{2}$  topological defects. It was already shown that topological  
35 defects in the cell elongation nematic field have a key role on epithelial dynamics  
36 (Kawaguchi, Kageyama and Sano, 2017) and on cell death and extrusion (Saw *et al.*,  
37 2017). Our results reinforce the idea that cell elongation nematic field, which could only  
38 arise from collective interaction between cells, can have an impact on epithelial  
39 morphogenesis.

40  
41 Since developing tissues are regularly subjected to internal oscillations (Solon *et al.*,  
42 2009; He *et al.*, 2010; Rauzi, Lenne and Lecuit, 2010) and external pulsatory forces  
43 (Zhang *et al.*, 2011; Hayes and Solon, 2017) in a number of living organisms, we explored  
44 the effect of external forces in the *in vitro* circular colonies. We observed that the direction  
45 of elongation could be rectified by imposing an external uniaxial cyclic force. This  
46 particular behavior is of great interest from an *in vivo* point of view: cyclic contraction  
47 could direct elongation in specific directions to trigger the next steps in morphogenesis.  
48 The generic localizations of muscles connected to epithelial layer (Zhang and Labouesse,

1 2012) could have this essential function for tissues which would otherwise elongate in  
2 any direction like in our assay. Finally, direction of this tissue rectification is along the  
3 external force, but perpendicular to the reorientation of single cell under external uniaxial  
4 stretching, and this further supports the collective nature of the phenomenon.

5  
6 We also systematically quantified the shear deformation kinematics of the colony and  
7 demonstrated that some of the colonies exhibit shear decomposition patterns similar to  
8 those observed during *Drosophila* pupal wing elongation (Etournay *et al.*, 2015).  
9 Moreover, while the colony deformation for the control colonies was dominated by cell  
10 elongation, T1 transitions were the main drivers of the colony shape anisotropy under  
11 cyclic uniaxial stretching thus indicating different mechanisms at work. Thus, the current  
12 work thus makes a direct comparison and contrast tissue kinematics between *in vivo* and  
13 *in vitro* cases.

14  
15 Finally, we developed a vertex model that takes into account mechanical anisotropies.  
16 Cell anisotropic active stress arising in the cell core, cortical contractility at the cell-cell  
17 junctions and cell motility are three of the important forces involved in morphogenesis of  
18 epithelial monolayers. To our knowledge, this is the first attempt to systematically show  
19 how each of these activities acts on tissue kinematics. Specifically, we showed that cell  
20 anisotropic active stress results mainly in cell elongation, whereas anisotropies in cortical  
21 contractility primarily effects cell intercalations or T1 transitions. Including cell motilities  
22 appears to enhance tissue shear generated by the other two modes of internal forcing. We  
23 perturbed active stress and line edge tension by inhibiting ROCK, which has been  
24 reported to be involved in cell-cell contact integrity *in vivo* (Nishimura and Takeichi,  
25 2008; Ewald *et al.*, 2012), and recently, in cell responses to stretching *in vitro* (Hart *et al.*,  
26 2020). This led to experimentally blocking the ability of colonies to respond to the  
27 externally applied uniaxial cyclic stretching. By doing so, colonies which primarily  
28 elongate through cell intercalations, shifted to a single cell elongation driven mechanism.

29  
30 From our simulations, we could demonstrate that symmetry breaking and finger  
31 formation in colonies and the corresponding tissue kinematics observed in our  
32 experiments could be brought about by collective active behavior of the colony cells and  
33 does not require special action of leader cells (Theveneau and Linker, 2017). This result  
34 echoes experiments in which the emergence of the leader cells and the fingering behavior  
35 at the border were suggested to arise due to the internal stress pattern in the tissue  
36 (Vishwakarma *et al.*, 2018). On the other hand, there are many excellent models in which  
37 the boundary cells are ascribed special motility properties that could replicate the  
38 experimental results on border fingering (Mark *et al.*, 2010; Tarle *et al.*, 2015). Thus,  
39 although leader cells at the boundary may play a role in the border fingering, our  
40 experimental findings and simulations clearly indicate that the cell-level internal  
41 activities and cell-cell interactions are sufficient to cause symmetry breaking in the colony  
42 shape and its overall kinematics via the collective cell-shape nematic field.

## 43 44 **Conclusion**

45  
46 Our results show that cell elongation nematic field can have an impact on epithelia  
47 morphogenesis. It was already reported that topological defects in the cell elongation  
48 nematic field have a key role on epithelial dynamics (Kawaguchi, Kageyama and Sano,  
49 2017) and on cell death and extrusion (Saw *et al.*, 2017). Now, we showed that circular  
50 epithelial colonies when in confinement build up a mean nematic orientation. This

1 symmetry breaking results from the inner activity of cells, and sets the direction for  
2 colony elongation. Epithelia changes in shape could be revisited *in vivo* with this new  
3 framework, leading to potential generic rule of morphogenesis in developmental biology.  
4

## 5 **Materials and Methods**

6 **Cell culture.** MDCK cells (GFP-E-cadherin strain (Adams *et al.*, 1998), GFP-Actin  
7 strain, mCherry-actin / GFP-myosin strain (Klingner *et al.*, 2014)) were cultured in  
8 Dulbecco's modified Eagle medium (D-MEM) 1g/l glucose (Invitrogen), supplemented  
9 with 10% fetal bovine serum (FBS) (Invitrogen) and 1% penicillin-streptomycin (and the  
10 corresponding resistance for each strain). Cells were passaged every 2-3 days using  
11 standard procedures. Caco-2 cells (ATCC) were cultured in minimum essential media  
12 (MEM) supplemented with Earle's salts (Life Technologies), 20% fetal calf serum (FCS)  
13 (Invitrogen), 0.1 mM non-essential amino acids, 1 mM sodium pyruvate and 40 µg/ml  
14 Gentamicin at 37°C and 5% CO<sub>2</sub>. Culture was passaged every 3-4 days. MCF 10A cells  
15 (ATCC) were cultured in Dulbecco's modified Eagle medium (D-MEM) 1g/l glucose  
16 (Invitrogen), supplemented with 10% horse serum (Invitrogen), 5 µg/ml insulin, 40 µg/ml  
17 Gentamicin, 2 mM L-Glutamine, 0.5 µg/ml Hydrocortisone and 2 ng/ml human  
18 epidermal growth factor (hEGF). Cells were passaged every 2-3 days. Cells tested  
19 negative for mycoplasma.  
20

21 **Fabrication of PDMS membranes and stencils.** Poly(dimethylsiloxane) (PDMS)  
22 (Sylgard) was prepared by mixing the pre-polymer and the cross-linker at a 10:1 ratio. To  
23 prepare stretchable membranes, uncured PDMS was first centrifuged (3000 rpm for 5  
24 min) to remove air bubbles. Afterwards, the PDMS was spin-coated on a flat polystyrene  
25 (PS) surface (500 rpm for 1 min) and cured at 65°C overnight. PDMS stencils were  
26 prepared as described previously (Ostuni *et al.*, 2000). Briefly, SU-8 2050 molds  
27 containing circles of 250 µm in diameter were prepared by standard photolithography.  
28 Uncured PDMS was then spin-coated on molds to a thickness lower than the height of  
29 the microstructures (50 µm) and cured overnight at 65°C. Stencils for the finger  
30 experiments were prepared by spin-coating uncured PDMS on a flat surface.  
31

32 **Cell seeding on stencils.** The PDMS stencils were cut, peeled off the mold, and placed  
33 in a 2% Pluronic F-127 (Sigma-Aldrich) in PBS for 1 h. The stencils were then kept in  
34 PBS for 2h and dried under the hood flow. PDMS stretchable membranes were cut and  
35 then activated using O<sub>2</sub> plasma. The membranes and the stencils were exposed to UV  
36 light in the cell culture hood for 10 min. Afterwards, stretchable membranes were  
37 incubated with fibronectin 20 µg/ml for 1 h, rinsed with PBS and dried. PDMS  
38 membranes were placed on a PS holder, and the PDMS stencils were deposited on top of  
39 the membrane right after. A rectangular PDMS chamber was attached onto the membrane  
40 using vacuum grease, and cells were seeded at a density of 20000 cells/mm<sup>2</sup> (Serra-  
41 Picamal *et al.*, 2012) for 4 h. When cells were attached, the medium was changed and the  
42 membrane with the cells was kept in the incubator. Local cell density could vary within  
43 each colony. We followed the dynamics of assembly of the colony prior removal of the  
44 stencil and we could see that cellular clusters size distribution and respective location  
45 within the cavity at plating could contribute to these variations. Once they formed  
46 confluent circular colonies, the stencils were removed with tweezers carefully before  
47 starting the experiment. Some of the colonies exhibited elongation in the short time  
48 window between stencil removal and the start of image acquisition.

1  
2  
3  
4  
5  
6  
7  
8  
9  
10  
11  
12  
13  
14  
15  
16  
17  
18  
19  
20  
21  
22  
23  
24  
25  
26  
27  
28  
29  
30  
31  
32  
33  
34  
35  
36  
37  
38  
39  
40  
41  
42  
43  
44  
45  
46  
47  
48  
49  
50

**Time-lapse microscopy.** After stencil removal, the medium was replaced by L-15 (Leibovitz's L-15 medium, Invitrogen) supplemented with 10% FBS. Cells were then observed under a Nikon Ti inverted microscope using either a x10 or a x20 objective for 6 h at 37°C. Images were acquired every 5 min.

**Stretching experiments.** The stretching device was designed in the lab. Briefly, a Thorlabs motor (Thorlabs z812 motor, Thorlabs) was controlling the motion of a PDMS membrane, and everything was mounted on a custom-made microscope stage. Circular colonies were plated on PDMS membranes, and after removal of the stencils, samples were placed on the microscope. Cyclic uniaxial stretches were applied and images were taken every 30 minutes typically shortly to prevent interfering with the time course of the experiments. We probed 3 times for cycles, 20s, 60s, 120s, and 3 extensions, 5%, 10%, and 20%. The shape of the cycles was triangular. We checked that the PDMS stencils were elastic at all extension and frequency ranges.

**Chemical treatments.** To prevent the formation of E-cadherin-mediated adhesion, cells were incubated for 30min with L-15 medium containing 5 mM EDTA (Sigma-Aldrich) and 10 µg/ml anti-E-cadherin blocking antibody that targeted the extracellular domain of E-cadherin (Gumbiner, Stevenson and Grimaldi, 1988) (uvomorulin, monoclonal anti-E-cadherin antibody, Sigma); after incubation, the medium was replaced by normal L-15 and the experiment started. The inhibition of ROCK was done by incubating cells with Y-27632 50 µM solution (Sigma-Aldrich) from 30 minutes before the experiment started until the end of the experiment.

**Finger dynamics experiments.** For the finger test after growth, we let finger grow for 2 hours, and we subsequently applied the cyclic stretch.

**Colony shape change analysis.** Shape change analysis was performed using ImageJ (<http://rsb.info.nih.gov/ij>, NIH). The outline of the colony on phase contrast images was ellipse fitted at every time point. Major axis  $a$ , minor axis  $b$ , and ellipse orientation  $\theta$  were obtained. We computed  $\mathbf{Q}$ , defined as  $Q_{xx}(t) = \frac{1}{2} \ln(a(t)/b(t)) \cdot \cos 2 \cdot (\theta(t) - \alpha)$  and  $Q_{xy}(t) = \frac{1}{2} \ln(a(t)/b(t)) \cdot \sin 2 \cdot (\theta(t) - \alpha)$  being  $\alpha = \theta(t_{final})$  to quantify cell colony elongation. In uniaxial stretching experiments, the  $x$  axis corresponds to the direction of the external stretch and  $\mathbf{Q}$  components are defined as  $Q_{xx}(t) = \frac{1}{2} \ln(a(t)/b(t)) \cdot \cos 2 \cdot (\theta(t) - \alpha)$  and  $Q_{xy}(t) = \frac{1}{2} \ln(a(t)/b(t)) \cdot \sin 2 \cdot (\theta(t) - \alpha)$  being  $\alpha = 0$ .

**Velocity analysis.** The centroid trajectories of cells were tracked using the manual tracking plug-in in ImageJ. Data analysis was performed using a custom-made code in MATLAB (The MathWorks). Cell positions were characterized by a vector  $\mathbf{r}(t)$ , with  $t$  denoting time and  $\mathbf{r}$  position in space (bold letter refers to a vector). Every recorded cell position during the time-lapse experiment was defined as  $\mathbf{r}_i = \mathbf{r}(t_i)$ , where  $t_i = i\Delta t$  are the times of recording and  $\Delta t$  denotes the duration of time-lapses. The average velocity of each cell was then defined as  $\mathbf{v} = (1/T) \cdot \sum_i \mathbf{r}_i$ , being  $r_i$  the module of the vector  $\mathbf{r}_i$  and  $T$  the total duration of the trajectory.

**Colony segmentation and cell tracking.** Movies acquired using a MDCK GFP-E-cadherin strain were first pre-processed with FIJI. The *subtract background* function was applied to remove noise. Images were then loaded to Tissue Analyzer (TA) v8.5 (Aigouy *et al.*, 2010) for edge detection and cell tracking.



1  
2 **Orientation field of the cells and topological defects.** First, the background noise of the  
3 time-lapse images of the elongating MDCK colonies was reduced with the *subtract*  
4 *background* function by using a rolling ball radius of 40 px. The resulting images were  
5 then subjected to *band-pass* filter with upper and lower limits of 40 px and 3 px,  
6 respectively. The background noise from this output was reduced by using the *subtract*  
7 *background* command again with a rolling ball radius of 40 px. The processed images  
8 from each experiment were analyzed with the OrientationJ plugin of FIJI to quantify their  
9 local spatial orientation that reflects the underlying cell elongation. Within this plugin  
10 we used a local smoothing window of 20 px (approximately of the size of the cells) to  
11 obtain the *structure tensor* at discrete points on a grid of 20 px × 20 px. The plugin  
12 provides the dominant direction  $\phi_i$  of the structure tensor at each point  $(x_i, y_i)$  that  
13 represents the local *orientation* field  $q_i = \cos \phi_i e_1 + \sin \phi_i e_2$  for cell elongation. The  
14 OrientationJ plugin also provides the *coherence*  $C$  of the structure tensor to quantify the  
15 strength of the orientation;  $C \approx 0$  and  $C \approx 1$  would approximately correspond to  
16 rounded and elongated cells, respectively. The orientation or the director field  $\mathbf{q}$  thus  
17 obtained was further quantified by studying the spatiotemporal evolution of  $\pm 1/2$   
18 topological defects that were obtained by calculating the winding number over unit-cells  
19 of the underlying grid. The local smoothing window of 20 px for obtaining the *structure*  
20 *tensor*, which is approximately of the size of cells, ensured that the most robust defects  
21 were observed. The validity of this procedure was cross-verified with the smoothed cell-  
22 shape nematic field and the corresponding  $\pm 1/2$  defects from the segmented and  
23 triangulated data of the experiments processed in Tissue Miner (TM) (Figure 5 – figure  
24 supplement 1 and Supplementary Material Section I). Finally, the orientation of mean  
25 cell-shape nematic calculated at 0 hr was compared with shape orientation of the colony  
26 at  $t = 2$  hrs. For obtaining the cell-shape nematic field for MCF 10A colonies, the  
27 procedure was the same as for MDCK control but the numerical parameters used were,  
28 rolling ball radius for *subtract background* 50 px, no band pass filter, and local smoothing  
29 window of 15 px and grid size of 30 px for OrientationJ. Similarly, for obtaining the cell-  
30 shape nematic field for stretched colonies, the procedure was the same as for MDCK  
31 control but the numerical parameters used were, rolling ball radius for *subtract*  
32 *background* 50 px, no band pass filter, and local smoothing window of 40 px and grid  
33 size of 30 px for OrientationJ. See Supplementary Material Section I for more details  
34 (also see Video 6).

35  
36 **Acto-myosin cables.** In order to image acto-myosin supracellular cables at the boundary  
37 of colonies either cells expressing mCherry-actin / GFP-myosin strain or cell  
38 immunostaining were used. To disrupt acto-myosin cables, local injection of 4  $\mu\text{M}$   
39 Cytochalasin D using a micropipette was performed. Glass micropipettes were connected  
40 to a microinjection system (CellTram vario, Eppendorf). The position of the pipette tip  
41 was controlled in  $x, y, z$  by using a micromanipulator. The system was mounted on an  
42 epifluorescence inverted microscope to record the process. Cytochalasin D was released  
43 locally for about 10 min. To detect discontinuities in the cable, fluorescent images of actin  
44 and myosin were treated using Fiji as follows. First, a median filter was applied and the  
45 background subtracted. Then, a contrast-limited adaptive histogram equalization  
46 (CLAHE) was used and the background was again removed using an exponential  
47 function. Images corresponding to actin and myosin were added. Finally, a Laplacian of  
48 Gaussian filter was applied to the resulting image. Once the cable structure was revealed,  
49 the positions of the defects were identified.

50

1 **Quantification of cellular deformations, topological transitions and their**  
2 **contribution to pure shear deformation.** After obtaining the geometrical and  
3 topological information of the colonies from the series tracked images generated using  
4 TA, TM was used to extract, triangulate and store the data with the help of an automated  
5 workflow. The database obtained after this stage of analysis was used to quantify various  
6 state properties such as cell area, neighbor number, cell elongation and the contribution  
7 of different cellular processes to deformation using scripts written both in *R* and in  
8 *Python*. TM was further used to quantify the contributions of various cellular events such  
9 as cell elongation and topological transitions to the colony deformation. More details  
10 about this analysis can be found in Supplementary Material Section I (also see Video 7).

11  
12 **Vertex Model Simulations.** A vertex model was developed with an addition of a unit  
13 nematic director  $\mathbf{p}$  to every cell. The orientation of the boundary cell  $\mathbf{p}$  was maintained  
14 parallel to the boundary, whereas  $\mathbf{p}$  for internal cells were modeled to tend to align with  
15 the  $\mathbf{p}$  of its neighbors. In these simulations, an extensile active stress  $\sigma_a(\mathbf{p}\mathbf{p}-\frac{1}{2}\mathbf{1})$  with  $\sigma_a < 0$   
16 acts to increase cell elongation along  $\mathbf{p}$ . In addition, a bias  $\lambda$  was also applied on the basic  
17 edge tension with respect to the director  $\mathbf{p}$  of its neighboring cells. For positive  $\lambda$ , this  
18 bias reduces (increases) the tension of the edge along (perpendicular to)  $\mathbf{p}$ . Consequently,  
19 the closure (formation) of edges is enhanced in the direction perpendicular (parallel) to  
20  $\mathbf{p}$ . Hence, the T1 transitions in the region around the cells are oriented to cause shear  
21 elongation (contraction) along (perpendicular) to  $\mathbf{p}$ . The colony is provided with an initial  
22 condition for  $\mathbf{p}$  that mimics the initial configuration of experimentally frequently  
23 observed cell shape nematic fields  $\mathbf{q}$  with two  $+1/2$  defects that are separated by a distance.  
24 The initial polar vector orientation along the nematic axis are chosen at random such that  
25 the total polarity is zero, and the dynamics of polarity reorientation is independent on a  $\mathbf{p}$   
26  $\rightarrow -\mathbf{p}$  flipping of the polarity axis. To begin with, the cell positions and director  
27 orientations were evolved under colony confinement until cell position and  $\mathbf{p}$  do not  
28 change significantly. The confinement is then removed to see how the colony breaks  
29 symmetry in its shape. In another set of simulations, a small motility  $v_0$  was also provided  
30 to the internal cells (Figure 7 – figure supplement 1). Similar to the experiments, the  
31 output of these simulations was also processed in TM and analyzed for topological defects  
32 and pure shear decomposition. For colonies subjected to uniaxial cyclic stretching,  $\mathbf{p}$  for  
33 any cell was provided with an additional tendency to align along the stretching orientation  
34 (*x*-axis). Moreover, the active stress in this case  $\sigma_a > 0$  was contractile, i.e., the cell  
35 tended to elongate perpendicular to the orientation of  $\mathbf{p}$ . More details of the simulations  
36 are provided in Supplementary Material Section II (also see Videos 8 and 9).

37  
38 **Statistics.** No statistical methods were used to predetermine sample size. Measurements  
39 were performed on different colonies (*n*) obtained in different independent experiments  
40 (*N*). The exact values are defined at the caption of each figure. Data presentation (as Mean  
41 value  $\pm$  standard deviation (SD) or as Mean value  $\pm$  standard error of the mean (SE)) is  
42 defined at the corresponding figure caption. D'Agostino normality test, Mann-Whitney  
43 test and Pearson's correlation were performed using GraphPad Prism 8. Specific values  
44 are noted at the corresponding figure captions.

## 45 **Acknowledgments**

46  
47  
48 We acknowledge M. Popovic and R. Etournay for stimulating discussions and help with  
49 Tissue Miner, J. Nelson, P. Silberzan, S. Coscoy for sharing the MDCK strains, and J.

1 Prost, K. Dayal and M. Zapotocky for helpful suggestions, D. Rodriguez, M. Lieb and  
2 the Riveline Lab. D.R. and M.M.I. thank MPI-PKS and MPI-CBG for hospitality and  
3 many interactions. D.R. acknowledges support from CNRS (ATIP), ciFRC Strasbourg,  
4 the University of Strasbourg, Labex IGBMC, Foundation Cino del Duca. This study with  
5 the reference ANR-10-LABX-0030-INRT has been also supported by a French state fund  
6 through the Agence Nationale de la Recherche under the frame programme  
7 Investissements d’Avenir labelled ANR-10-IDEX-0002-02. M.M.I. acknowledges  
8 funding from Department of Biotechnology, Government of India (BT/06/IYBA/2012)  
9 and Industrial Research and Consultancy Center (IRCC), IIT Bombay. G.S. was  
10 supported by the Francis Crick Institute which receives its core funding from Cancer  
11 Research UK (FC001317), the UK Medical Research Council (FC001317), and the  
12 Wellcome Trust (FC001317).

13

## 14 **Competing interests**

15

16 The authors declare no competing interests.

## 17 **References**

- 18 Adams, C. L. *et al.* (1998) ‘Mechanisms of Epithelial Cell–Cell Adhesion and Cell  
19 Compaction Revealed by High-resolution Tracking of E-Cadherin– Green Fluorescent  
20 Protein’, *The Journal of Cell Biology*, 142(4), pp. 1105–1119. doi:  
21 10.1083/jcb.142.4.1105.
- 22 Aigouy, B. *et al.* (2010) ‘Cell Flow Reorients the Axis of Planar Polarity in the Wing  
23 Epithelium of *Drosophila*’, *Cell*, 142(5), pp. 773–786. doi: 10.1016/j.cell.2010.07.042.
- 24 Alt, S., Ganguly, P. and Salbreux, G. (2017) ‘Vertex models: From cell mechanics to  
25 tissue morphogenesis’, *Philosophical Transactions of the Royal Society B: Biological  
26 Sciences*, 372(1720), p. 20150520. doi: 10.1098/rstb.2015.0520.
- 27 Bénazéraf, B. *et al.* (2010) ‘A random cell motility gradient downstream of FGF  
28 controls elongation of an amniote embryo.’, *Nature*, 466(7303), pp. 248–252. doi:  
29 10.1038/nature09151.
- 30 Blanchard, G. B. *et al.* (2009) ‘Tissue tectonics: morphogenetic strain rates, cell shape  
31 change and intercalation’, *Nature Methods*. Nature Publishing Group, 6(6), pp. 458–  
32 464. doi: 10.1038/nmeth.1327.
- 33 Calzolari, S., Terriente, J. and Pujades, C. (2014) ‘Cell segregation in the vertebrate  
34 hindbrain relies on actomyosin cables located at the interhombomeric boundaries’,  
35 *EMBO Journal*, 33(7), pp. 686–701. doi: 10.1002/embj.201386003.
- 36 Campinho, P. *et al.* (2013) ‘Tension-oriented cell divisions limit anisotropic tissue  
37 tension in epithelial spreading during zebrafish epiboly.’, *Nature cell biology*. Nature  
38 Publishing Group, 15(12), pp. 1405–14. doi: 10.1038/ncb2869.
- 39 Clarletta, P., Ben Amar, M. and Labouesse, M. (2009) ‘Continuum model of epithelial  
40 morphogenesis during *Caenorhabditis elegans* embryonic elongation’, *Philosophical  
41 Transactions of the Royal Society A: Mathematical, Physical and Engineering Sciences*,  
42 367(1902), pp. 3379–3400. doi: 10.1098/rsta.2009.0088.
- 43 Doostmohammadi, A., Thampi, S. P. and Yeomans, J. M. (2016) ‘Defect-Mediated  
44 Morphologies in Growing Cell Colonies’, *Physical Review Letters*, 117(4), pp. 1–5. doi:  
45 10.1103/PhysRevLett.117.048102.

- 1 Doxzen, K. *et al.* (2013) ‘Guidance of collective cell migration by substrate geometry’,  
2 *Integrative Biology*, 5, pp. 1026–1035. doi: 10.1039/C3IB40054A.
- 3 Etournay, R. *et al.* (2015) ‘Interplay of cell dynamics and epithelial tension during  
4 morphogenesis of the *Drosophila* pupal wing’, *eLife*, 4(JUNE2015), pp. 1–51. doi:  
5 10.7554/eLife.07090.
- 6 Etournay, R. *et al.* (2016) ‘TissueMiner: A multiscale analysis toolkit to quantify how  
7 cellular processes create tissue dynamics’, *eLife*, 5(MAY2016), pp. 1–28. doi:  
8 10.7554/eLife.14334.
- 9 Ewald, A. J. *et al.* (2012) ‘Mammary collective cell migration involves transient loss of  
10 epithelial features and individual cell migration within the epithelium.’, *Journal of cell*  
11 *science*, pp. 2638–2654. doi: 10.1242/jcs.096875.
- 12 Faust, U. *et al.* (2011) ‘Cyclic stress at mHz frequencies aligns fibroblasts in direction  
13 of zero strain.’, *PloS one*, 6(12), p. e28963. doi: 10.1371/journal.pone.0028963.
- 14 Fodor, É. *et al.* (2018) ‘Spatial Fluctuations at Vertices of Epithelial Layers:  
15 Quantification of Regulation by Rho Pathway’, *Biophysical Journal*, 114(4), pp. 939–  
16 946. doi: 10.1016/j.bpj.2017.12.026.
- 17 Gilmour, D., Rembold, M. and Leptin, M. (2017) ‘From morphogen to morphogenesis  
18 and back’, *Nature*, 541(7637), pp. 311–320. doi: 10.1038/nature21348.
- 19 Guillot, C. and Lecuit, T. (2013) ‘Mechanics of Epithelial Tissue Homeostasis and  
20 Morphogenesis’, *Science*, 340(6137), pp. 1185–1189. doi: 10.1126/science.1235249.
- 21 Guirao, B. *et al.* (2015) ‘Unified quantitative characterization of epithelial tissue  
22 development’, *eLife*, 4(DECEMBER2015), pp. 1–52. doi: 10.7554/eLife.08519.
- 23 Gumbiner, B., Stevenson, B. and Grimaldi, a. (1988) ‘The role of the cell adhesion  
24 molecule uvomorulin in the formation and maintenance of the epithelial junctional  
25 complex.’, *Journal of Cell Biology*, 107(4), pp. 1575–1587. doi:  
26 10.1083/jcb.107.4.1575.
- 27 Harris, A. R., Daeden, A. and Charras, G. T. (2014) ‘Formation of adherens junctions  
28 leads to the emergence of a tissue-level tension in epithelial monolayers.’, *Journal of*  
29 *cell science*, pp. 2507–2517. doi: 10.1242/jcs.142349.
- 30 Hart, K. C. *et al.* (2020) *An Easy-to-Fabricate Cell Stretching System Reveals Density-*  
31 *Dependent Mechanical Regulation of Collective Cell Movements in Epithelial*  
32 *Homeostasis*. doi: <https://doi.org/10.1101/2020.08.24.265629>.
- 33 Hayes, P. and Solon, J. (2017) ‘*Drosophila* dorsal closure: An orchestra of forces to zip  
34 shut the embryo’, *Mechanisms of Development*. The Authors, 144, pp. 2–10. doi:  
35 10.1016/j.mod.2016.12.005.
- 36 He, L. *et al.* (2010) ‘Tissue elongation requires oscillating contractions of a basal  
37 actomyosin network.’, *Nature cell biology*, 12(12), pp. 1133–42. doi: 10.1038/ncb2124.
- 38 Kawaguchi, K., Kageyama, R. and Sano, M. (2017) ‘Topological defects control  
39 collective dynamics in neural progenitor cell cultures’, *Nature*. Nature Publishing  
40 Group, 545(7654), pp. 327–331. doi: 10.1038/nature22321.
- 41 Klingner, C. *et al.* (2014) ‘Isotropic actomyosin dynamics promote organization of the  
42 apical cell cortex in epithelial cells.’, *The Journal of cell biology*, 207(1), pp. 107–21.  
43 doi: 10.1083/jcb.201402037.
- 44 Lecuit, T. and Lenne, P.-F. P.-F. (2007) ‘Cell surface mechanics and the control of cell



- 1 shape, tissue patterns and morphogenesis', *Nat Rev Mol Cell Biol*. Nature Publishing  
2 Group, 8(8), pp. 633–644. Available at: <http://dx.doi.org/10.1038/nrm2222>.
- 3 Mark, S. *et al.* (2010) 'Physical model of the dynamic instability in an expanding cell  
4 culture', *Biophysical Journal*. Elsevier, 98(3), pp. 361–370. doi:  
5 10.1016/j.bpj.2009.10.022.
- 6 Monier, B. *et al.* (2010) 'An actomyosin-based barrier inhibits cell mixing at  
7 compartmental boundaries in *Drosophila* embryos.', *Nature cell biology*. Nature  
8 Publishing Group, 12(1), pp. 60–65; sup pp 1-9. doi: 10.1038/ncb2005.
- 9 Mueller, R., Yeomans, J. M. and Doostmohammadi, A. (2019) 'Emergence of Active  
10 Nematic Behavior in Monolayers of Isotropic Cells', *Physical Review Letters*.  
11 American Physical Society, 122(4), p. 48004. doi: 10.1103/PhysRevLett.122.048004.
- 12 Nishimura, T. and Takeichi, M. (2008) 'Shroom3-mediated recruitment of Rho kinases  
13 to the apical cell junctions regulates epithelial and neuroepithelial planar remodeling.',  
14 *Development (Cambridge, England)*, 135(8), pp. 1493–1502. doi: 10.1242/dev.019646.
- 15 Ostuni, E. *et al.* (2000) 'Patterning Mammalian Cells Using Elastomeric Membranes',  
16 *Langmuir*, 16(20), pp. 7811–7819.
- 17 Rauzi, M. *et al.* (2008) 'Nature and anisotropy of cortical forces orienting *Drosophila*  
18 tissue morphogenesis.', *Nature cell biology*, 10(12), pp. 1401–10. doi:  
19 10.1038/ncb1798.
- 20 Rauzi, M., Lenne, P.-F. and Lecuit, T. (2010) 'Planar polarized actomyosin contractile  
21 flows control epithelial junction remodelling.', *Nature*. Nature Publishing Group,  
22 468(7327), pp. 1110–4. doi: 10.1038/nature09566.
- 23 Reffay, M. *et al.* (2011) 'Orientation and polarity in collectively migrating cell  
24 structures: statics and dynamics.', *Biophysical journal*. Biophysical Society, 100(11),  
25 pp. 2566–75. doi: 10.1016/j.bpj.2011.04.047.
- 26 Reffay, M. *et al.* (2014) 'Interplay of RhoA and mechanical forces in collective cell  
27 migration driven by leader cells.', *Nature cell biology*, 16(3), pp. 217–23. doi:  
28 10.1038/ncb2917.
- 29 Reinsch, S. and Karsenti, E. (1994) 'Orientation of Spindle Axis and Distribution of  
30 Plasma Membrane Proteins during Cell Division in Polarized MDCKII Cells', *Journal*  
31 *of Cell Biology*, 126(6), pp. 1509–1526.
- 32 Riveline, D. *et al.* (2001) 'Focal contacts as mechanosensors: externally applied local  
33 mechanical force induces growth of focal contacts by an mDia1-dependent and rock-  
34 independent mechanism', *J Cell Biol*, 153(6), pp. 1175–1186. doi:  
35 10.1083/jcb.153.6.1175.
- 36 Saw, T. B. *et al.* (2017) 'Topological defects in epithelia govern cell death and  
37 extrusion', *Nature*. Nature Publishing Group, 544(7649), pp. 212–216. doi:  
38 10.1038/nature21718.
- 39 Serra-Picamal, X. *et al.* (2012) 'Mechanical waves during tissue expansion', *Nature*  
40 *Physics*. Nature Publishing Group, 8(8), pp. 628–634. doi: 10.1038/nphys2355.
- 41 Shyer, A. E. *et al.* (2013) 'Villification: How the Gut Gets Its Villi', *Science*,  
42 342(6155), pp. 212–218. doi: 10.1126/science.1238842. Villification.
- 43 Solon, J. *et al.* (2009) 'Pulsed Forces Timed by a Ratchet-like Mechanism Drive  
44 Directed Tissue Movement during Dorsal Closure', *Cell*, 137(7), pp. 1331–1342. doi:  
45 10.1016/j.cell.2009.03.050.

- 1 Tarle, V. *et al.* (2015) ‘Modeling the finger instability in an expanding cell monolayer’,  
2 *Integrative Biology (United Kingdom)*. Royal Society of Chemistry, 7(10), pp. 1218–  
3 1227. doi: 10.1039/c5ib00092k.
- 4 Theveneau, E. and Linker, C. (2017) ‘Leaders in collective migration: Are front cells  
5 really endowed with a particular set of skills?’, *F1000Research*, 6, pp. 1–11. doi:  
6 10.12688/f1000research.11889.1.
- 7 Vishwakarma, M. *et al.* (2018) ‘Mechanical interactions among followers determine the  
8 emergence of leaders in migrating epithelial cell collectives’, *Nature Communications*.  
9 Springer US, 9(1). doi: 10.1038/s41467-018-05927-6.
- 10 Vuong-Brender, T. T. K., Yang, X. and Labouesse, M. (2016) ‘Chapter Thirty-Five - C.  
11 elegans Embryonic Morphogenesis’, in Wassarman, P. (ed.) *Essays on Developmental*  
12 *Biology, Part A*. Academic Press, pp. 597–616. doi:  
13 <https://doi.org/10.1016/bs.ctdb.2015.11.012>.
- 14 Zhang, H. *et al.* (2011) ‘A tension-induced mechanotransduction pathway promotes  
15 epithelial morphogenesis.’, *Nature*, 471(7336), pp. 99–103. doi: 10.1038/nature09765.
- 16 Zhang, H. and Labouesse, M. (2012) ‘Signalling through mechanical inputs - a  
17 coordinated process’, *Journal of Cell Science*, 125(13), pp. 3039–3049. doi:  
18 10.1242/jcs.093666.
- 19  
20

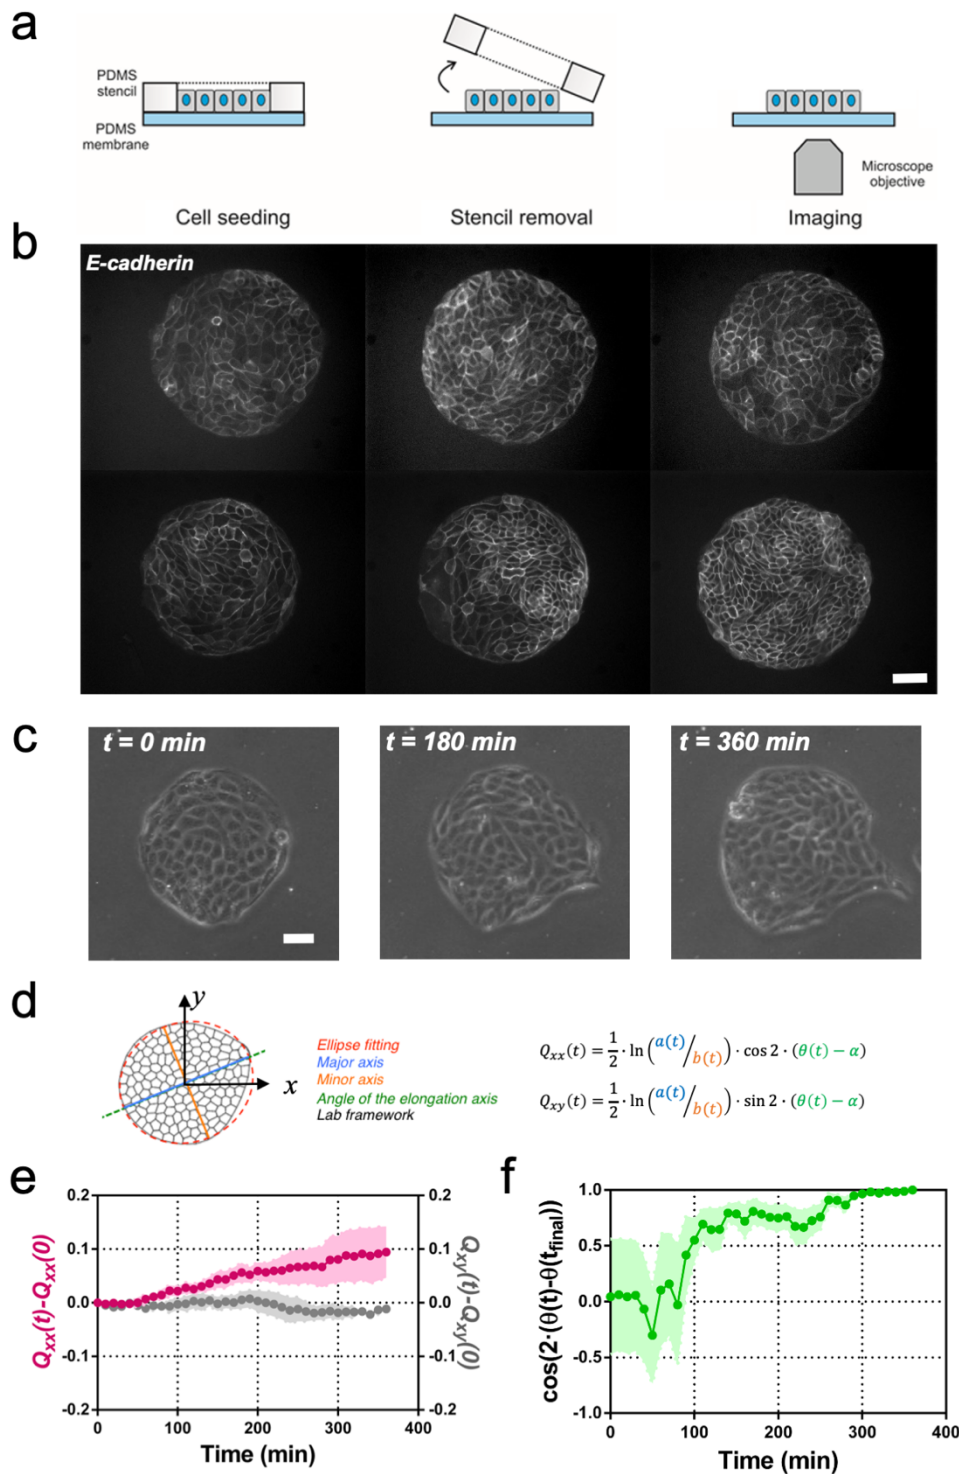

**Figure 1. Symmetry breaking and its quantification.** (a) Schematics of the experimental set-up: MDCK cells were seeded on a PDMS membrane using stencils to predefine their shape. When the colony was confluent, the stencil was removed and the expansion of the colony was observed under the microscope. (b) Several examples of MDCK colonies (GFP-E-cadherin) after stencil removal and prior to colony expansion. Scale bar 50  $\mu\text{m}$ . (c) Phase contrast images of the spontaneous elongation of a MDCK colony for 360 min. Scale bar 50  $\mu\text{m}$ . (d) Colony elongation is quantified by ellipse fitting and  $Q_{xx}$  and  $Q_{xy}$  measurement referred to the elongation axis ( $\alpha = \theta(t_{\text{final}})$ ). (e)  $Q_{xx}$  (left y axis) and  $Q_{xy}$  (right y axis) during 360 min of colony expansion. Mean value  $\pm$  standard error of the mean,  $n = 4$  colonies from  $N = 4$  independent experiments. (f) Cosine of two times the angle difference between the instantaneous main direction of the colony ( $\theta(t)$ )

and the main direction of the colony at 360 min ( $\theta(t_{\text{final}})$ ). Colonies set the elongation direction within the first 120 min. Mean value  $\pm$  standard error of the mean,  $n = 4$  colonies from  $N = 4$  independent experiments.



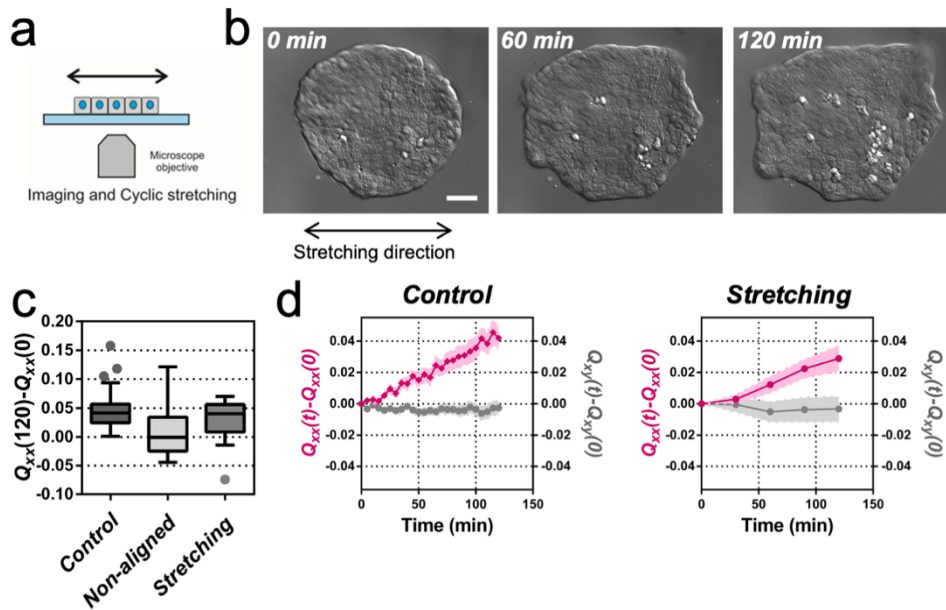

**Figure 2. Uniaxial cyclic stretching rectifies symmetry breaking.** (a) Schematics of the experiment where the colony expansion was observed under the microscope while the underlying membrane was uniaxially stretched. (b) Snapshots of the expansion of a MDCK colony while cyclically stretched. Scale bar 50  $\mu\text{m}$ . (c) Colony elongation ( $Q_{xx}$ ) of control colonies along the elongation axis, control colonies in the laboratory framework (non-aligned,  $\alpha = 0$ ) and colonies under cyclic uniaxial stretching in the laboratory framework (uniaxial stretching,  $\alpha = 0$ ). Box Plot between 25th and 75th percentile, being the line in the box the median value, whiskers and outliers (dots) are obtained following Tukey's method,  $N_{\text{control}} = 11$  independent experiments,  $n = 25$  colonies and  $N_{\text{stretching}} = 9$ ,  $n = 20$  colonies. Mann-Whitney test control vs control aligned  $p = 0.0003$ , control vs stretching  $p = 0.0281$  and control aligned vs stretching  $p = 0.3319$ . (d)  $Q_{xx}$  (left y axis) and  $Q_{xy}$  (right y axis) during 120 min of colony expansion for control colonies and colonies under cyclic uniaxial stretching. Mean value  $\pm$  standard error of the mean,  $N_{\text{control}} = 8$ ,  $n = 14$  colonies and  $N_{\text{stretching}} = 9$ ,  $n = 20$  colonies.

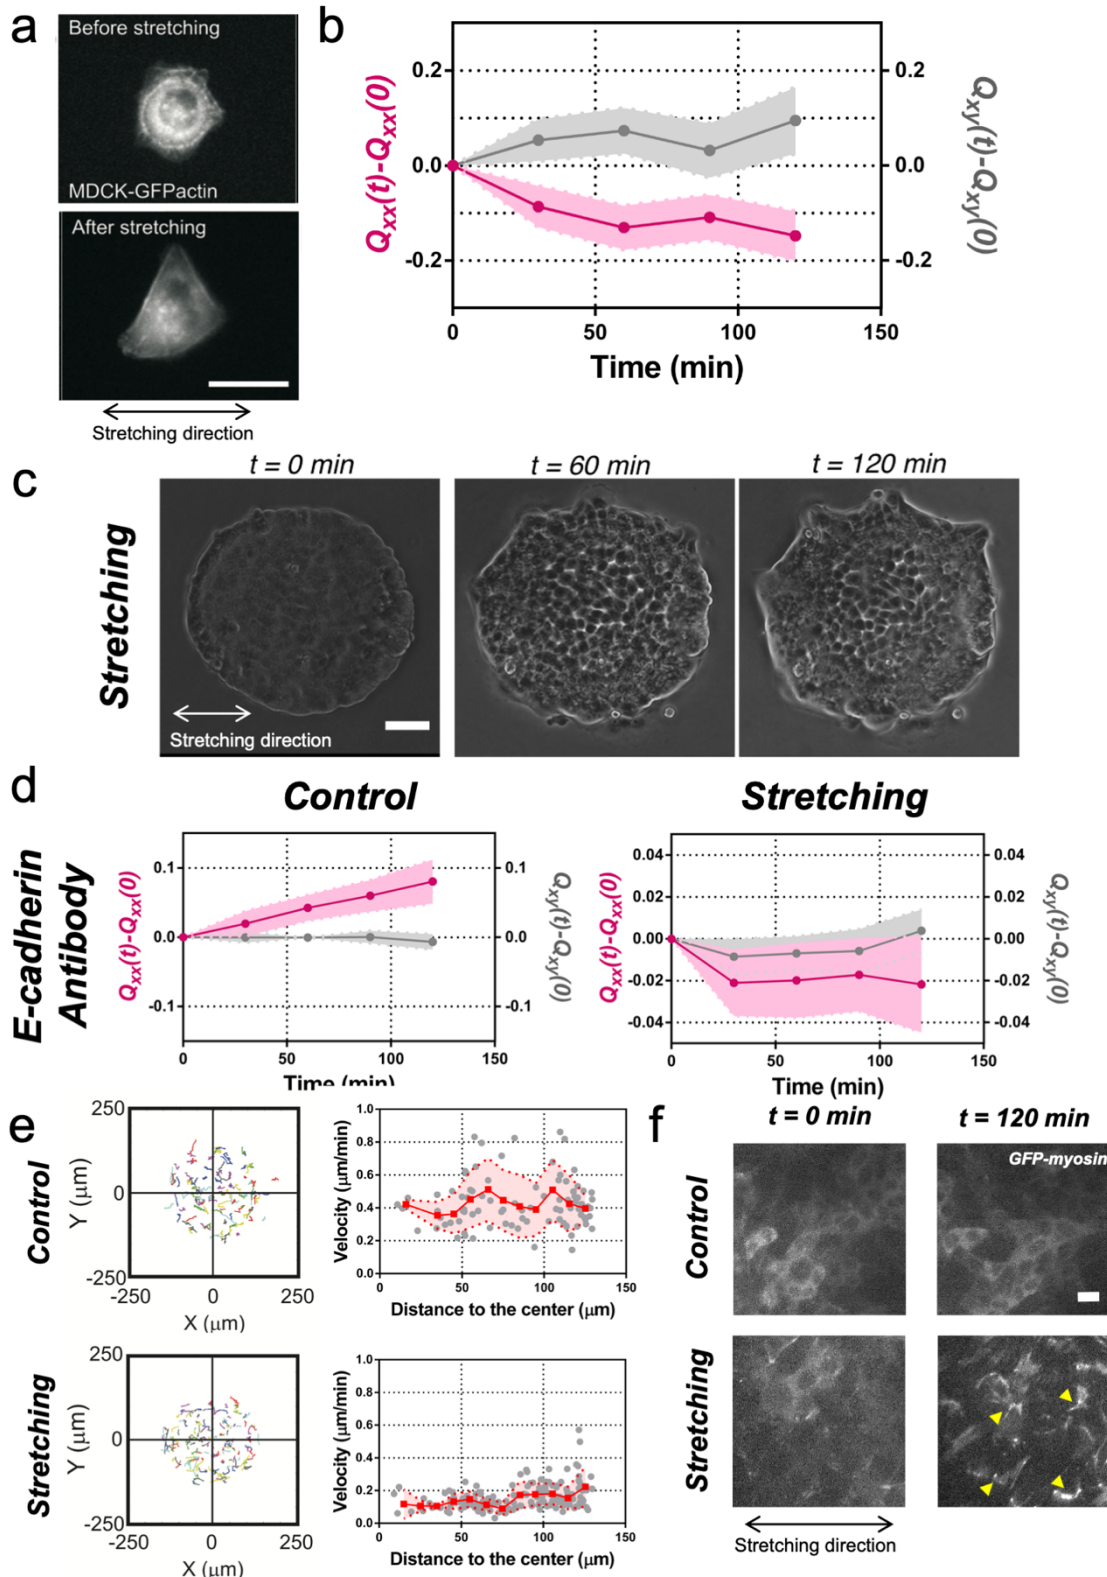

**Figure 3. Collective effects are essential for rectification.** (a) Image of a single MDCK-GFP-actin cell before and after being stretch for 2 hours (5% strain and 60s period). Scale bar 20 $\mu\text{m}$ . (b)  $Q_{xx}$  (left y axis) and  $Q_{xy}$  (right y axis) of single cells during 120 min of cyclic uniaxial stretching ( $\alpha = 0$ ). Mean value  $\pm$  standard error of the mean.  $N = 3$ ,  $n = 31$  cells. (c) Phase contrast images of an MDCK colony evolving for 120 min under cyclic mechanical stretching when E-cadherins are blocked by an E-cadherin antibody. Scale bar 50 $\mu\text{m}$ . (d) Comparison of the cumulative  $Q_{xx}$  (left y axis) and cumulative  $Q_{xy}$  (right y axis) during 120 min of colony expansion when E-cadherin are blocked by an E-cadherin antibody in control and under cyclic uniaxial

stretching ( $\alpha = 0$ ). Mean value  $\pm$  standard error of the mean,  $N_{\text{control}} = 3$ ,  $n = 8$  colonies and  $N_{\text{stretching}} = 4$ ,  $n = 15$  colonies. **(e)** Trajectories of cells (left) and single cell velocity as a function of its distance to the center of the colony (right) in control colonies (top) and under cyclic uniaxial stretching (bottom).  $n_{\text{control}} = 90$  cells from 8 colonies of  $N_{\text{control}} = 4$  independent experiments and  $n_{\text{stretching}} = 154$  cells from 13 colonies of  $N_{\text{stretching}} = 4$  independent experiments. Individual cells in grey, red square and line corresponds mean (binned by distance to the center), shadowed area corresponds to SD. **(f)** Myosin distribution inside MDCK-GFP-myosin colonies at 0 min and at 120 min after expansion in control and under uniaxial stretching. Note the myosin structures appearing in the stretching case (yellow arrows). Scale bar 10  $\mu\text{m}$ .

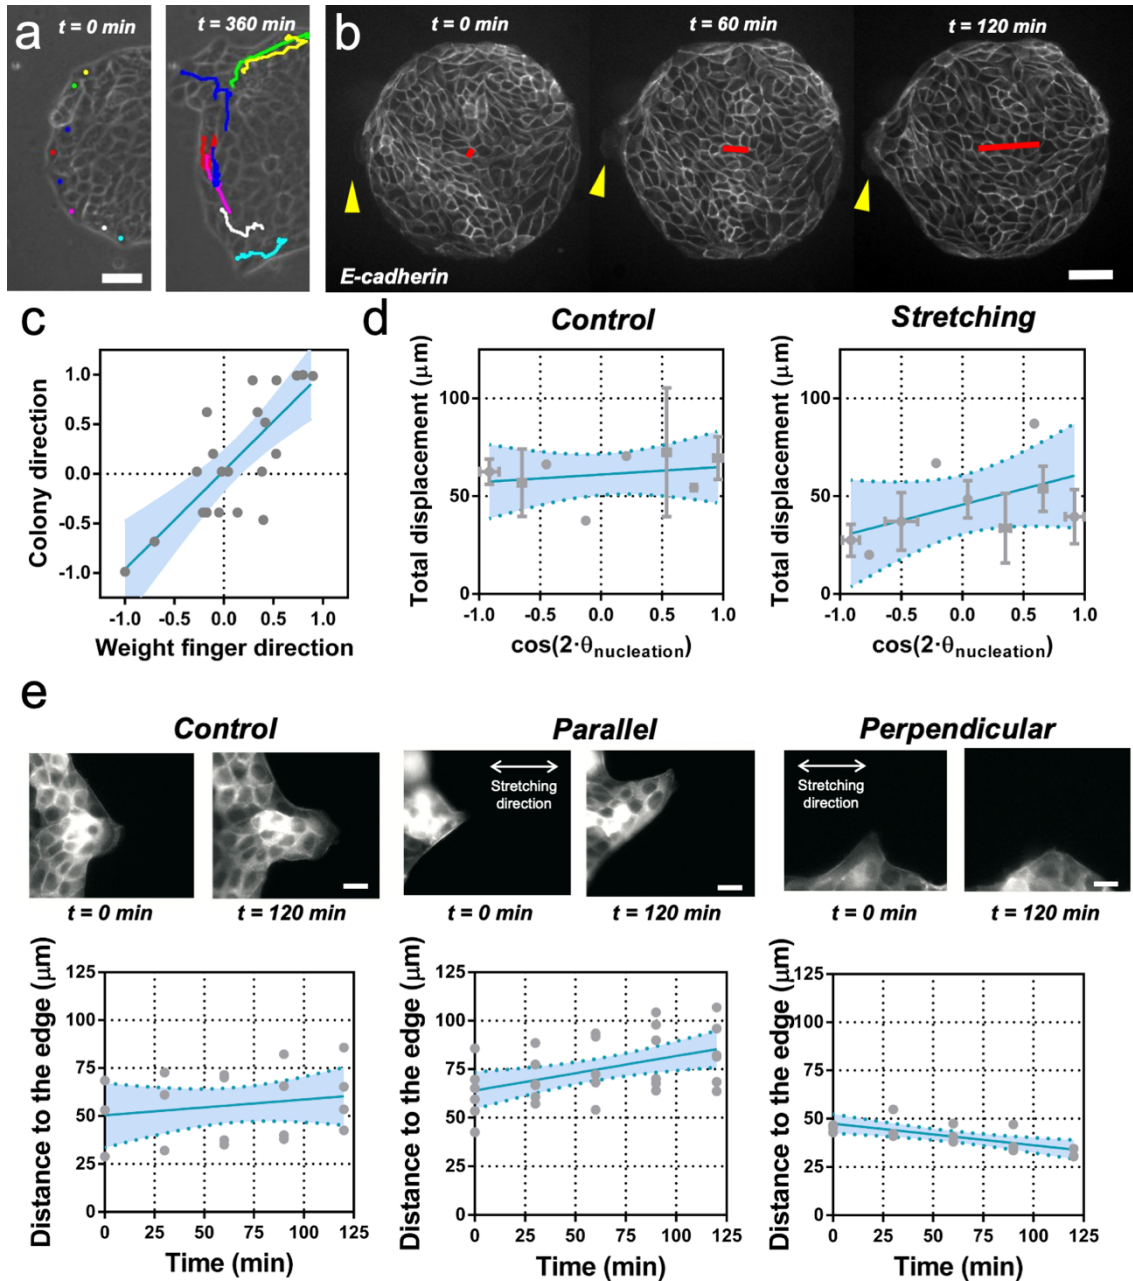

**Figure 4. Fingers and symmetry breaking.** (a) Trajectories of boundary cells during colony expansion. Two types of trajectories are observed: radial and tangential. Scale bar 50  $\mu\text{m}$ . (b) Fluorescent images (GFP-E-cadherin) of a colony evolving for 120 min. Red line shows the orientation of the colony according to ellipse fitting (length scales with the change in  $Q_{xx}$ ) and yellow arrow indicates a cell migrating radially. Scale bar 50  $\mu\text{m}$ . (c) Direction of the colony elongation (quantified by the cosine of 2 times the angle of the main axis of the colony at  $t = 2$  hours) as a function of the weight finger direction (quantified by the average of the cosine of 2 times the angle of each finger trajectory, e.g. the angle corresponding to the vector between the position of the finger at  $t = 0$  hours and  $t = 2$  hours, of each finger weight by the finger's displacement).  $N = 5$ ,  $n_{\text{colonies}} = 12$  colonies and  $n_{\text{finger}} = 21$  fingers. Blue line corresponds to the linear fitting of the data points and the shadowed area corresponds to the 95% confidence interval. Pearson's correlation coefficient  $r = 0.7724$ ,  $p = 0.0001$ . (d) Total displacement of finger growth as a function of its initial position in the colony (angular coordinate from the center of the colony) for control colonies and colonies under uniaxial stretching.  $N = 5$  independent experiments,  $n_{\text{colonies}} = 11$  colonies and  $n_{\text{finger}} = 21$  fingers (control) and  $N = 6$ ,  $n_{\text{colonies}} = 10$  colonies and  $n_{\text{finger}} = 28$  fingers (stretching). Averaged fingers in grey (both position and distance, Mean  $\pm$  SD), blue line corresponds to the linear fitting of the data points and the shadowed area corresponds to the

95% confidence interval. (e) Distance between the tip of the finger and the edge of the monolayer along time, for monolayers in control conditions, stretched parallel and perpendicular to the finger growth direction.  $N_{\text{control}} = 3$ ,  $N_{\text{parallel}} = 4$  and  $N_{\text{perpendicular}} = 3$  independent experiments and  $n = 4$ , 6 and 3 fingers respectively. Individual fingers in grey, blue line corresponds to the linear fitting of the data points and the shadowed area corresponds to the 95% confidence interval.



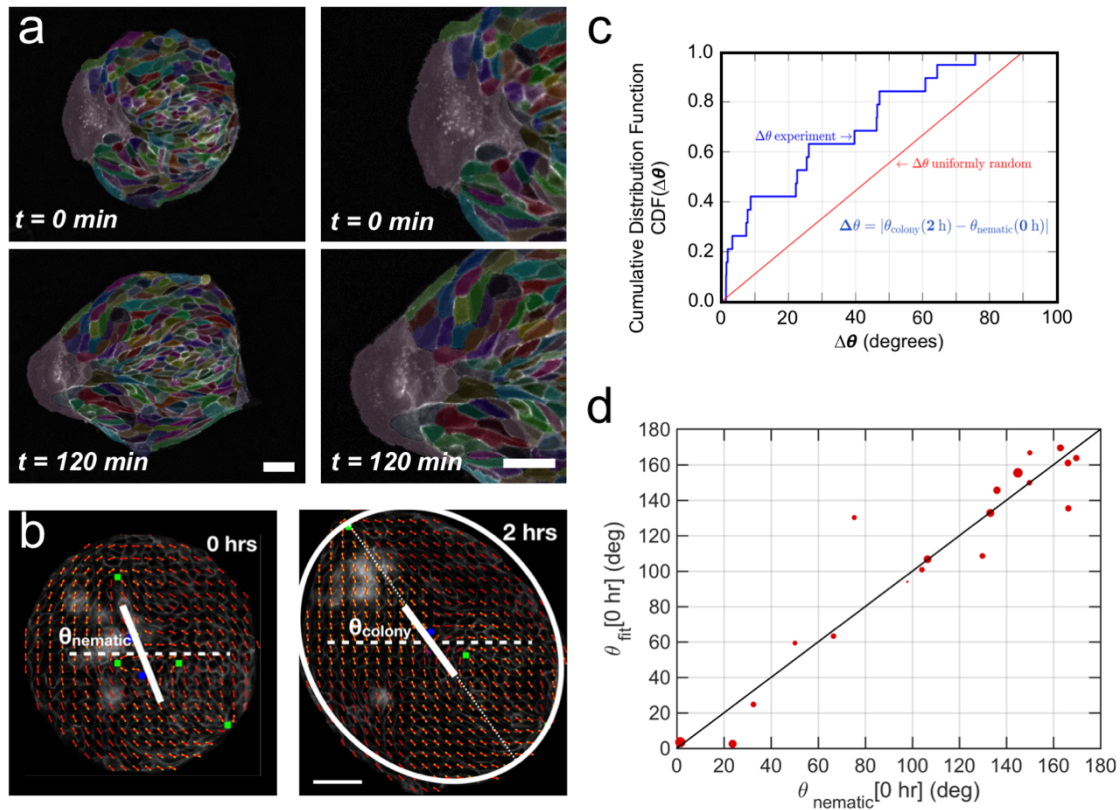

**Figure 5. Collective effects and symmetry breaking.** (a) A leader cell at the boundary of the colony pulls the colony outwards while inner cells deform and elongate. Scale bar  $50 \mu\text{m}$ . (b) Cell shape is quantified using a nematic field (red segments). First, the mean cell shape nematic is quantified at the moment of stencil removal (0 hours) and the orientation  $\theta_{\text{nematic}}$  of its mean for the entire colony is obtained. Then, the overall shape of the colony after 2 hours is obtained by fitting an ellipse, whose major axis makes an angle  $\theta_{\text{colony}}$ . The yellow directors correspond to fits for the cell shape nematic field obtained with respect to the  $+1/2$  and  $-1/2$  topological defects of the experimentally obtained (red) nematic field (also see Supplementary Material Section V for details.) Scale bar  $50 \mu\text{m}$ . (c) The cumulative distribution function (CDF) for the difference  $\Delta\theta$  between  $\theta_{\text{nematic}}(0 \text{ hours})$  and  $\theta_{\text{colony}}(2 \text{ hours})$  is obtained from  $n = 19$  colonies of  $N = 5$  independent experiments. Red line corresponds to the CDF of a random distribution of the difference  $\Delta\theta$ . This plot shows a strong correlation between the cell shape nematic and the overall shape symmetry breaking (also see Figure 5 – figure supplement 1d, and Supplementary Material Section IE). (d) The experimentally measured angle of mean nematic orientation  $\theta_{\text{nematic}}$  obtained for 19 colonies at  $t = 0 \text{ h}$  is compared with its counterpart  $\theta_{\text{fit}}$  obtained by fitting the experimental data with Eq. 1 of the main paper with respect to the orientation parameter  $\alpha$  (see Section ID of Supplementary Material). The size of the red circles in (b) is proportional to the magnitude of anisotropy of the colony shape after 2 h.  $n = 19$  colonies of  $N = 5$  independent experiments.

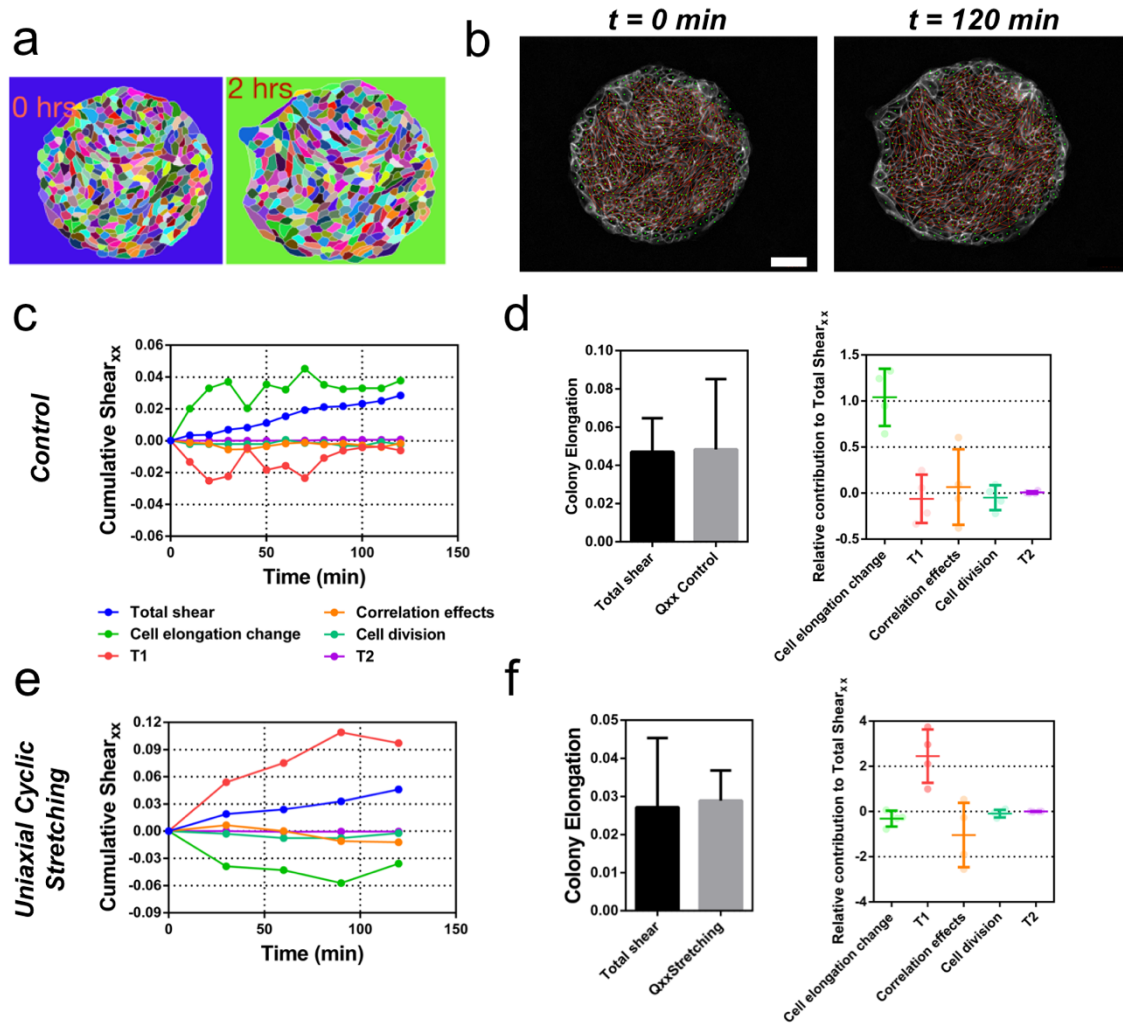

**Figure 6. Contributions to symmetry breaking.** (a) Snapshots of two colonies from control condition segmented and tracked for cells using Tissue-Analyzer (TA) for a duration of  $t = 120$  minutes starting from removal of stencil at  $t = 0$ . Scale bar 50  $\mu\text{m}$ . (b) The segmented and tracked images are triangulated in Tissue-Miner (TM). Scale bar 50  $\mu\text{m}$ . The green dots represent the centers of the segmented cells. (c) The dynamics of triangulation is analyzed in TM to provide the overall  $xx$  component of cumulative pure shear strain in a sample colony as a function of time (total shear). (d) Comparison between the mean total pure shear obtained from TM and the overall colony pure shear obtained from ellipse fitting (left). Total shear corresponds to  $n_{\text{colonies}} = 4$  colonies from  $N = 2$  independent experiments and  $Q_{xx}$  control was obtained from  $n_{\text{colonies}} = 25$  colonies of  $N = 11$  independent experiments. Relative contribution of the different processes to the total pure shear (right). Total shear and contributions were obtained from  $n_{\text{colonies}} = 4$  colonies from  $N = 2$  independent experiments. (e) Cumulative pure shear decomposition for stretched colony. (f) Comparison between the mean total pure shear obtained from TM and the overall colony pure shear obtained from ellipse fitting (left) and relative contribution of the different processes to the total pure shear (stretching case). Total shear corresponds to  $n_{\text{colonies}} = 4$  colonies from  $N = 4$  independent experiments and  $Q_{xx}$  stretching was obtained from  $n_{\text{colonies}} = 20$  colonies of  $N = 9$  independent experiments. Relative contribution of the different processes to the total pure shear (right). Total shear and contributions were obtained from  $n_{\text{colonies}} = 4$  colonies from  $N = 4$  independent experiments.

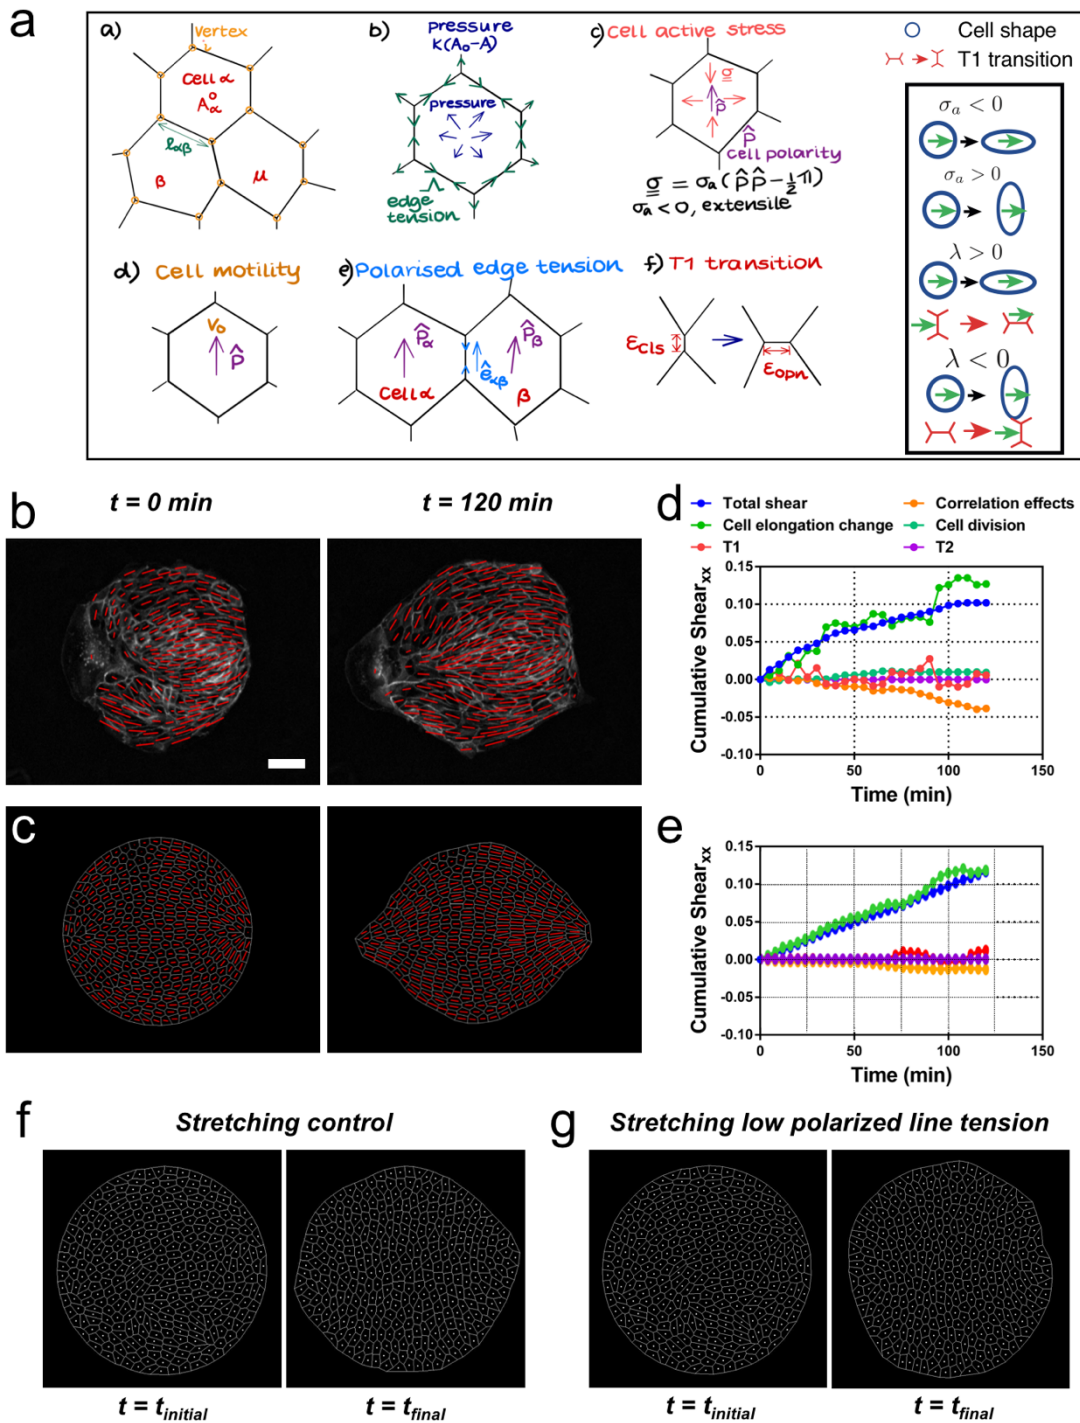

**Figure 7. Vertex model recapitulates symmetry breaking and shear decomposition.** (a) Schematic of vertex model depicting the arrangement of cells, forcing, and topological transitions in a tissue. (a) 2-D monolayer of epithelial cells is represented by polygons, generally sharing a common edge and two vertices between cells. For any cell  $\alpha$  shown in the figure,  $A_\alpha$  is the area,  $A_\alpha^0$  is the preferred area and  $l_{\alpha\beta}$  is the length of the edge shared between cells  $\alpha$  and  $\beta$ . The forces on any vertex  $i$  in the basic vertex model are from (b) pressure due to deviation in the cell area from its preferred value and the tensile force arising from edge or cortical contractility  $\Lambda$ . In our model each cell also has a polarity  $\hat{p}$  associated with it through which active forces can act on the cell vertices due to (c) anisotropic cell active stress (extensile in our case), (d) cell motility  $v_0$  and (e) polarised or biased edge tension that depends on the orientation of the edge  $\hat{e}_{\alpha\beta}$  with respect to the polarities of the adjoining cells. (f) When the edge connecting two cells becomes smaller

than a critical value  $\epsilon_{\text{cls}}$ , the cells are made to modify their neighbours by forming a new edge of length  $\epsilon_{\text{opn}} > \epsilon_{\text{cls}}$  as shown. Scheme depicting the different possibilities from the model parameters. **(b)** Experimental coarse-grained cell shape nematic at  $t=0$  and  $t=120$  min. Scale bar 50  $\mu\text{m}$ . **(c)** A vertex model with internal activity arising from extensile active cell stress ( $\sigma_a' = -5$ ) and biased edge tension for the cell-cell junctions ( $\lambda' = 20$ ). Prime symbol ' refers to non-dimensional values (see Supplementary Material Section II). **(d)** Overall  $xx$  component of cumulative pure shear strain in the sample colony shown in **(b)** as a function of time (total shear). **(e)** Shear decomposition of the *in silico* experiment which is similar to its experimental counterpart in **(d)**. **(f)** A vertex model with an additional aligning term that defines the direction of the uniaxial stretching through cell polarity. When cell-cell junctions are intact, biased edge tension ( $\lambda' = 50$ ) dominates over active cell stress ( $\sigma_a' = 2$ ) and the colony elongates along the (horizontal) direction of stretch collectively through T1 transitions. **(g)** When the effect of edge tensions is lowered ( $\lambda' = 25$ ) and active cell stress is increased ( $\sigma_a' = 4$ ), the colony elongates perpendicularly to the direction of stretch.

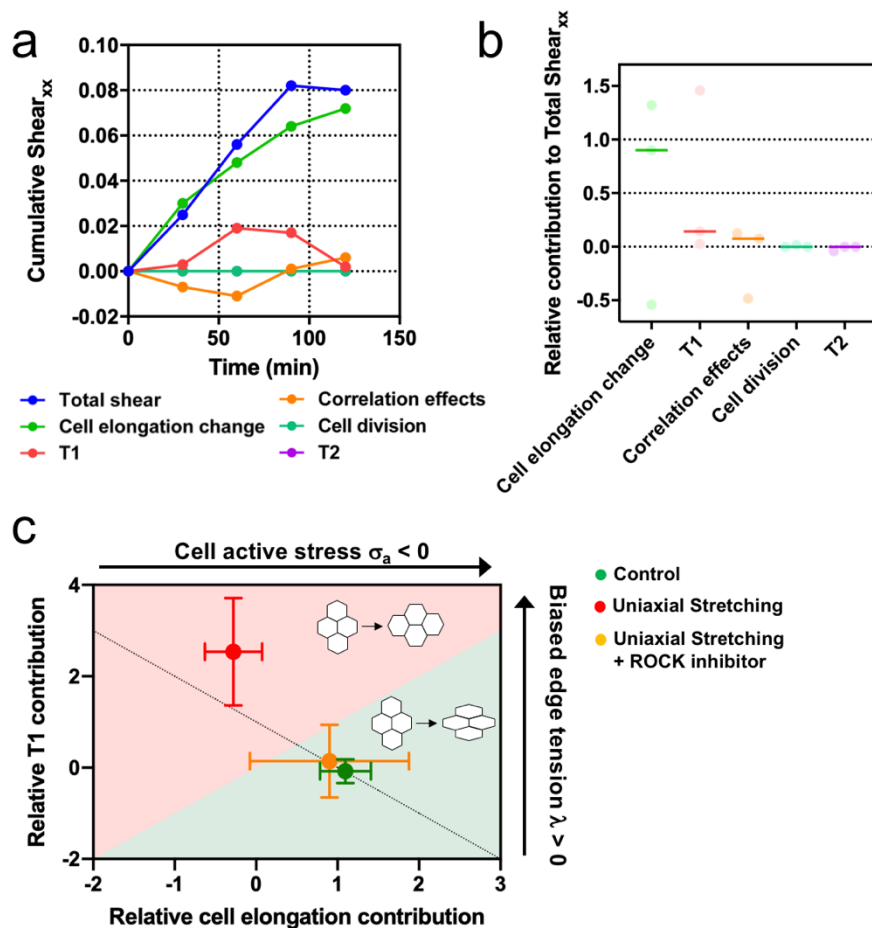

**Figure 8. Stretching-dependent elongation is mediated by ROCK.** (a) Cumulative pure shear decomposition for stretched colony in the presence of ROCK inhibitor Y-27632 50  $\mu\text{M}$ . (b) Relative contribution of the different processes to the total pure shear. Total shear and contributions were obtained from  $n_{\text{colonies}} = 3$  colonies from  $N = 3$  independent experiments. Individual experiments and median are plotted. (c) Contribution of single cell elongation to total elongation versus contribution of T1 transitions to total elongation. In the green area single cell elongation dominates over T1, whereas red area corresponds to T1 transitions dominating over cell elongation. Along the dashed line, contribution of correlation effects and oriented cell division to total shear is close to zero. Above this line this contribution is negative and below the line is positive. According to our vertex model, by changing the strength of cellular active stress and biased edge tension, colonies change the relative contribution of each mechanism of elongation. Experiments show that epithelial colonies spontaneously elongate through single cell elongation (green point,  $N = 2$ ,  $n_{\text{colonies}} = 4$ ), whereas colonies under uniaxial stretching elongate through T1 (red dot,  $N = 4$ ,  $n_{\text{colonies}} = 4$ ). When ROCK activity is inhibited, colonies under uniaxial stretching elongate through single cell elongation (orange dot,  $N = 3$ ,  $n_{\text{colonies}} = 3$ ). Points represent median  $\pm$  SD.
